# Supplementary material for: Palladium-catalyzed cross-coupling of unreactive C(sp3)–H bonds with azole C(sp2)–H bonds by using bromide as a traceless directing group
Source: Royal Society of Chemistry journal article supplement (doi:10.1039/d2cc01944b), 2022-01-01

## Supporting Information

# **Palladium-Catalyzed Cross-Coupling of Unreactive C(sp<sup>3</sup>)-H Bonds with Azole C(sp<sup>2</sup>)-H Bonds by Using Bromide as a Traceless Directing Group**

Yan-Zhen Chen, Jian-Guo Fu, Xiao-Ming Ji,\* Shu-Sheng Zhang,\* Chen-Guo Feng\*

The Research Center of Chiral Drugs, Innovation Research Institute of Traditional Chinese  
Medicine, Shanghai University of Traditional Chinese Medicine, Shanghai 201203, China

E-mail: fengcg@shutcm.edu.cn; zhangss@shutcm.edu.cn; jixiaoming@tongji.edu.cn

### Table of Contents

|                                                                                                        |     |
|--------------------------------------------------------------------------------------------------------|-----|
| 1. General Information .....                                                                           | S2  |
| 2. General Procedures for the Synthesis of Substrates .....                                            | S2  |
| 3. General Procedures for the Cross-Coupling of C(sp <sup>3</sup> )-H/C(sp <sup>2</sup> )-H Bonds..... | S3  |
| 4. Preliminary Mechanistic Studies .....                                                               | S4  |
| 5. Characterization of the Substrates .....                                                            | S5  |
| 6. Characterization of the Products.....                                                               | S5  |
| 7. References .....                                                                                    | S13 |
| 8. NMR Spectra.....                                                                                    | S14 |

## 1. General Information

$\text{Pd}(\text{OAc})_2$  was purchased from Strem Chemicals. All solvents were dried by JC Meyer Solvent Drying System. Unless otherwise noted, the other commercial chemicals were used without further purification.  $^1\text{H}$  NMR and  $^{13}\text{C}$  NMR spectra were recorded on Bruker DRX-600 instrument (600 MHz). High resolution mass spectra were measured on Bruker MicroTOF II ESI-TOF mass spectrometer. NMR spectra were recorded in  $\text{CDCl}_3$ .  $^1\text{H}$  NMR spectra were referenced to residual  $\text{CHCl}_3$  at 7.26 ppm, and  $^{13}\text{C}$  NMR spectra were referenced to the central peak of  $\text{CDCl}_3$  at 77.0 ppm. Chemical shifts ( $\delta$ ) are reported in ppm, and coupling constants ( $J$ ) are in Hertz (Hz). Multiplicities are reported using the following abbreviations: s = singlet, d = doublet, t = triplet, q = quartet, m = multiplet.

## 2. General Procedures for the Synthesis of Substrates

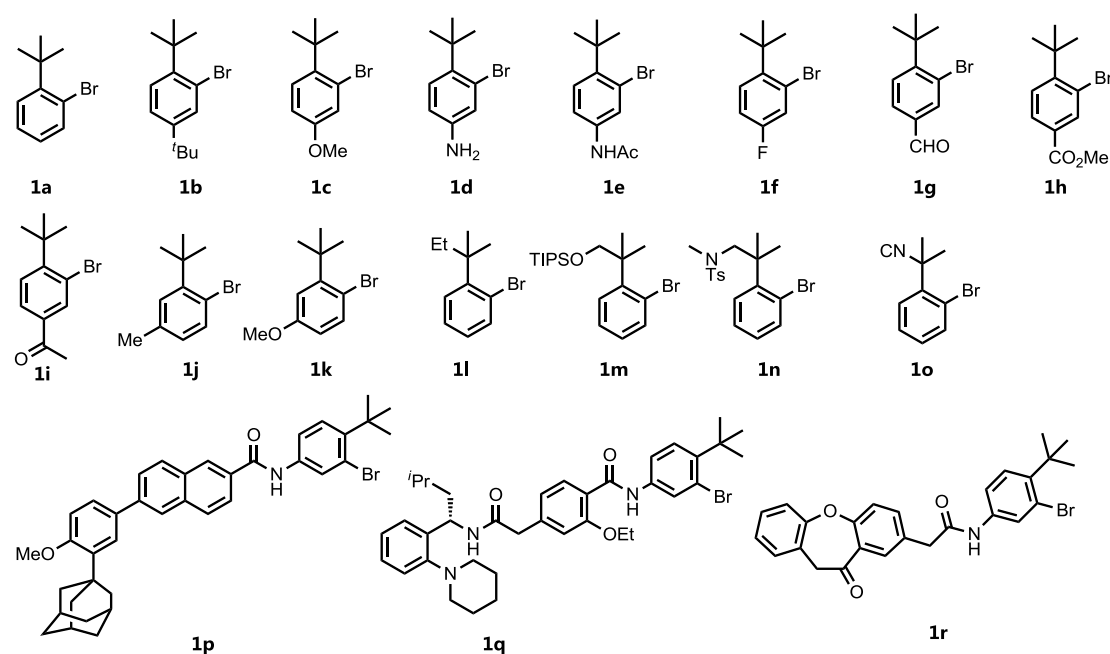

The known compounds (**1a-1k** and **1m-1r**) were prepared by following the reported procedures.<sup>1-3</sup> The known 1,3,4-oxadiazoles were prepared by following the reported procedures.<sup>4</sup>

### Procedures for the Synthesis of the Compound **1l**

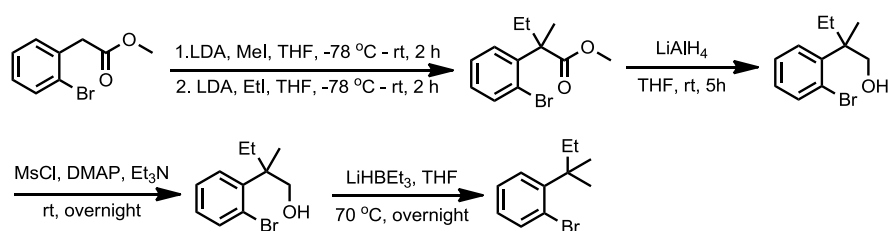

1-Bromo-2-(*tert*-pentyl)benzene (**1l**) was made according to the modified procedures.<sup>5,6</sup> Methyl 2-(2-bromophenyl)acetate (4.58 g, 20 mmol) was dissolved in dry THF (1 M) under

nitrogen and LDA (11 mL, 22 mmol, 2 M in THF) was added at  $-78\text{ }^{\circ}\text{C}$  *via* syringe. After stirring for 10 min at this temperature, MeI (3.12 g, 22 mmol) was added and the mixture was stirred for 2 h at room temperature. The reaction mixture was quenched with water and extracted with EtOAc (3 times). The combined organic layers were dried over sodium sulfate, filtered and evaporated under reduced pressure without further purification to provide desired product methyl 2-(2-bromophenyl)propanoate.

Dry THF (1 M) was added to dissolve the crude product under nitrogen and LDA (11 mL, 22 mmol, 2 M in THF) was added at  $-78\text{ }^{\circ}\text{C}$  *via* syringe. After stirring for 10 min at this temperature, EtI (3.43 g, 22 mmol) was added and the mixture was stirred for 2 h at room temperature. The reaction mixture was quenched with water and extracted with EtOAc (3 times). The combined organic layers were dried over sodium sulfate, filtered and evaporated under vacuum. The residue was purified on silica gel to give 2-(2-bromophenyl)-2-methylbutanoate as a yellow oil (5.0 g, 92%).

Over a  $0\text{ }^{\circ}\text{C}$  solution of methyl 2-(2-bromophenyl)-2-methylbutanoate (2.51 g, 9 mmol) in anhydrous THF (45 mL) was added  $\text{LiAlH}_4$  (345 mg, 9 mmol) portionwise. The reaction was stirred for 5 h at room temperature. The reaction mixture was quenched with water and extracted with EtOAc (3 times), washed with brine, dried over  $\text{MgSO}_4$  and concentrated. The residue was purified on silica gel to give the corresponding alcohol product as a colorless oil (1.35 g, 62%).

Over a solution of the alcohol (1.51 g, 6 mmol) and DMAP (146 mg, 1.2 mmol) in dry DCM (30 mL) was added dry  $\text{Et}_3\text{N}$  (304 mg, 18 mmol). After stirring for 30 min at  $0\text{ }^{\circ}\text{C}$ ,  $\text{MsCl}$  (1.37 g, 12 mmol) was added. The reaction was stirred overnight while warming up to room temperature. When completed,  $\text{Et}_2\text{O}$  was added followed by  $\text{NH}_4\text{Cl}$  (aq.). The reaction was extracted with  $\text{Et}_2\text{O}$  (3 times), washed with brine, dried over  $\text{MgSO}_4$  and concentrated. The crude was used in the next step without further purification.

Over a solution of the mesylate (321 mg, 1 mmol) in anhydrous THF (1 mL) under nitrogen was added Super-Hydride (2.1 mL, 1M in THF). The reaction was heated at  $70\text{ }^{\circ}\text{C}$  overnight. When completed, the reaction was quenched by addition of  $\text{NH}_4\text{Cl}$  (aq.). The reaction was extracted with  $\text{Et}_2\text{O}$  (3 times), dried over  $\text{MgSO}_4$ , concentrated and purified on silica gel column to give 1-bromo-2-(*tert*-pentyl)benzene (**11**) as a colorless oil (1.09 g, 80%).

### 3. General Procedures for the Cross-Coupling of $\text{C}(\text{sp}^3)\text{-H}/\text{C}(\text{sp}^2)\text{-H}$ Bonds

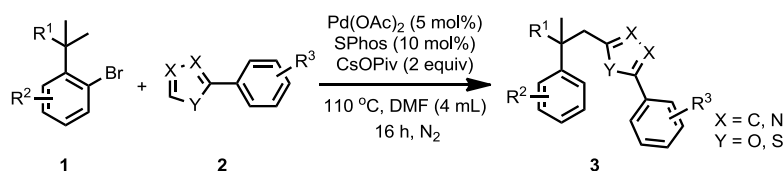

A 25 mL Schlenk-type tube (with a Teflon screw cap and a side arm) equipped with a magnetic stir bar was charged with  $\text{Pd}(\text{OAc})_2$  (2.2 mg, 0.01 mmol), SPhos (8.2 mg, 0.02 mmol), CsOPiv (93.6 mg, 0.4 mmol), the corresponding aryl bromide **1** (0.2 mmol), oxadiazole **2** (0.3 mmol, 1.5 equiv) and DMF (4 mL). The reaction was frozen with liquid nitrogen and then the tube was evacuated and backfilled with nitrogen (5 times). The mixture was stirred at  $110\text{ }^{\circ}\text{C}$  (preheated oil bath) for 16 hours. After cooling to room temperature, the reaction mixture was diluted with EtOAc (15 mL), washed with water (3 times), dried over  $\text{Na}_2\text{SO}_4$  and concentrated

under reduced pressure. The residue was purified by preparative silica gel TLC with petroleum ether/ethyl acetate to give the corresponding products.

## 4. Preliminary Mechanistic Studies

### 4.1 Mechanistic Studies

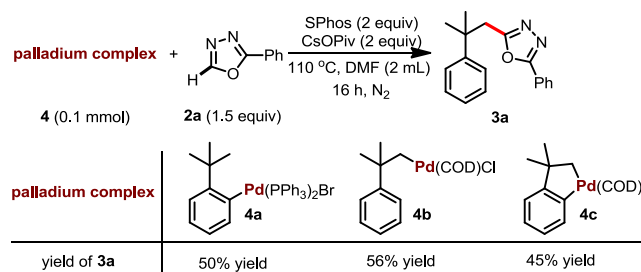

A 25 mL Schlenk-type tube (with a Teflon screw cap and a side arm) equipped with a magnetic stir bar was charged with the corresponding Pd complex **4** (0.1 mmol, 1 equiv),<sup>2</sup> SPhos (82.1 mg, 0.2 mmol), 2-phenyl-1,3,4-oxadiazole **2a** (21.9 mg, 0.15 mmol), CsOPiv (46.8 mg, 0.2 mmol), and DMF (2 mL). The reaction was frozen with liquid nitrogen and then the tube was evacuated and backfilled with nitrogen (5 times). The mixture was stirred at 110 °C (preheated oil bath) for 16 hours. After cooling to room temperature, the reaction mixture was diluted with EtOAc (15 mL), washed with water (3 times), dried over Na<sub>2</sub>SO<sub>4</sub> and concentrated under reduced pressure. The residue was purified by preparative thin layer chromatography (PTLC) affording cross-coupling product **3a** as a white solid.

### 4.2 Kinetic Isotope Effect Studies

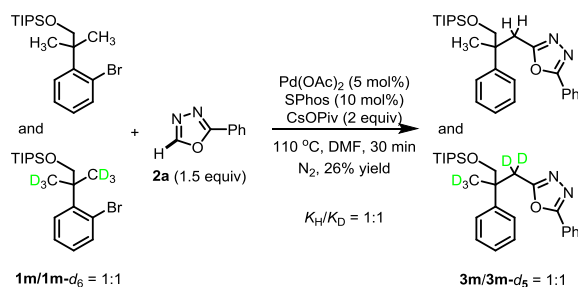

A 25 mL Schlenk-type tube (with a Teflon screw cap and a side arm) equipped with a magnetic stir bar was charged with Pd(OAc)<sub>2</sub> (2.2 mg, 0.01 mmol), SPhos (8.21 mg, 0.02 mmol), CsOPiv (93.6 mg, 0.4 mmol), 2-phenyl-1,3,4-oxadiazole **2a** (0.3 mmol, 1.5 equiv), aryl bromide **1m** (0.1 mmol), **1m-d<sup>6</sup>** (0.1 mmol) and DMF (4 mL). The reaction was frozen with liquid nitrogen and then the tube was evacuated and backfilled with nitrogen (5 times). The mixture was stirred at 110 °C (preheated oil bath) for 30 mins. After cooling to room temperature, the reaction mixture was diluted with EtOAc (15 mL), washed with water (3 times), dried over Na<sub>2</sub>SO<sub>4</sub> and concentrated under reduced pressure. The product was analyzed by <sup>1</sup>H NMR after purification by preparative silica gel TLC with petroleum ether/ethyl acetate.

## 5. Characterization of the Substrates

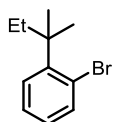

**1-Bromo-2-(tert-pentyl)benzene (11):** colorless oil.  $^1\text{H}$  NMR (600 MHz,  $\text{CDCl}_3$ )  $\delta$  7.57 (d,  $J = 7.8$  Hz, 1H), 7.37 (d,  $J = 8.0$  Hz, 1H), 7.24 (t,  $J = 7.6$  Hz, 1H), 7.03 (t,  $J = 7.5$  Hz, 1H), 2.04 (q,  $J = 7.5$  Hz, 2H), 1.45 (s, 6H), 0.64 (t,  $J = 7.3$  Hz, 3H).  $^{13}\text{C}$  NMR (151 MHz,  $\text{CDCl}_3$ )  $\delta$  146.07, 135.63, 129.40, 127.34, 127.01, 122.54, 40.20, 32.30, 28.16, 9.35. MS (EI): ( $\text{M}^+$ ): 225.9.

## 6. Characterization of the Products

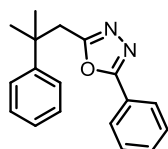

**2-(2-Methyl-2-phenylpropyl)-5-phenyl-1,3,4-oxadiazole (3a):** white solid (49.0 mg, 88%).  $^1\text{H}$  NMR (600 MHz,  $\text{CDCl}_3$ )  $\delta$  7.84 – 7.79 (m, 2H), 7.50 – 7.46 (m, 1H), 7.46 – 7.42 (m, 2H), 7.40 (dd,  $J = 8.4, 1.1$  Hz, 2H), 7.36 – 7.31 (m, 2H), 7.25 – 7.21 (m, 1H), 3.24 (s, 2H), 1.51 (s, 6H).  $^{13}\text{C}$  NMR (151 MHz,  $\text{CDCl}_3$ )  $\delta$  164.93, 164.63, 147.23, 131.41, 128.90, 128.34, 126.65, 126.32, 125.56, 123.93, 40.01, 38.13, 28.50. HRMS (ESI-TOF)  $m/z$ : calcd for  $\text{C}_{18}\text{H}_{18}\text{N}_2\text{ONa}^+$ : 301.1311 ( $\text{M} + \text{Na}$ ) $^+$ , found: 301.1327.

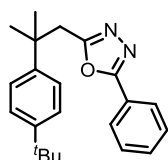

**2-(2-(4-(Tert-butyl)phenyl)-2-methylpropyl)-5-phenyl-1,3,4-oxadiazole (3b):** white solid (57.0 mg, 85%).  $^1\text{H}$  NMR (600 MHz,  $\text{CDCl}_3$ )  $\delta$  7.79 – 7.75 (m, 2H), 7.47 (t,  $J = 7.4$  Hz, 1H), 7.41 (t,  $J = 7.6$  Hz, 2H), 7.35 (d,  $J = 8.5$  Hz, 2H), 7.31 (d,  $J = 8.5$  Hz, 2H), 3.22 (s, 2H), 1.50 (s, 6H), 1.32 (s, 9H).  $^{13}\text{C}$  NMR (151 MHz,  $\text{CDCl}_3$ )  $\delta$  164.98, 164.56, 148.98, 144.07, 131.35, 128.81, 126.59, 125.28, 125.11, 123.90, 40.15, 37.74, 34.27, 31.30, 28.41. HRMS (ESI-TOF)  $m/z$ : calcd for  $\text{C}_{22}\text{H}_{26}\text{N}_2\text{ONa}^+$ : 357.1937 ( $\text{M} + \text{Na}$ ) $^+$ , found: 357.1941.

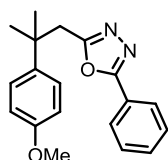

**2-(2-(4-Methoxyphenyl)-2-methylpropyl)-5-phenyl-1,3,4-oxadiazole (3c):** white solid (57.2 mg, 93%).  $^1\text{H}$  NMR (600 MHz,  $\text{CDCl}_3$ )  $\delta$  7.86 – 7.83 (m, 2H), 7.51 – 7.47 (m, 1H), 7.47 – 7.43 (m, 2H), 7.32 – 7.28 (m, 2H), 6.88 – 6.84 (m, 2H), 3.78 (s, 3H), 3.20 (s, 2H), 1.49 (s, 6H).  $^{13}\text{C}$  NMR (151 MHz,  $\text{CDCl}_3$ )  $\delta$  165.02, 164.62, 157.94, 139.36, 131.42, 128.91, 126.66, 126.65, 124.00, 113.63, 55.24, 40.19, 37.60, 28.68. HRMS (ESI-TOF)  $m/z$ : calcd for  $\text{C}_{19}\text{H}_{21}\text{N}_2\text{O}_2^+$ : 309.1598 ( $\text{M} + \text{H}$ ) $^+$ , found: 309.1606.

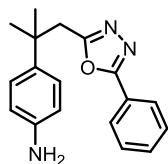

**4-(2-Methyl-1-(5-phenyl-1,3,4-oxadiazol-2-yl)propan-2-yl)aniline (3d):** brown oil (29.4 mg, 50%).  $^1\text{H}$  NMR (600 MHz,  $\text{CDCl}_3$ )  $\delta$  7.91 – 7.85 (m, 2H), 7.52 – 7.42 (m, 3H), 7.19 – 7.14 (m, 2H), 6.68 – 6.61 (m, 2H), 3.63 (brs, 2H), 3.17 (s, 2H), 1.46 (s, 6H).  $^{13}\text{C}$  NMR (151 MHz,  $\text{CDCl}_3$ ) 165.16, 164.56, 144.57, 137.23, 131.34, 128.88, 126.64, 126.37, 123.97, 114.93, 40.12, 37.41, 28.59. HRMS (ESI-TOF)  $m/z$ : calcd for  $\text{C}_{18}\text{H}_{20}\text{N}_3\text{O}^+$  : 294.1601 ( $\text{M} + \text{H}$ ) $^+$ , found: 294.1604.

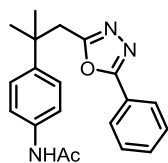

**N-(4-(2-methyl-1-(5-phenyl-1,3,4-oxadiazol-2-yl)propan-2-yl)phenyl)acetamide (3e):** yellow solid (54.8 mg, 82%).  $^1\text{H}$  NMR (600 MHz,  $\text{CDCl}_3$ )  $\delta$  7.87 – 7.83 (m, 2H), 7.65 (s, 1H), 7.50 – 7.41 (m, 5H), 7.34 – 7.29 (m, 2H), 3.20 (s, 2H), 2.14 (s, 3H), 1.48 (s, 6H).  $^{13}\text{C}$  NMR (151 MHz,  $\text{CDCl}_3$ )  $\delta$  168.41, 164.90, 164.66, 142.99, 136.25, 131.47, 128.94, 126.66, 126.09, 123.81, 119.85, 39.93, 37.82, 28.57, 24.44. HRMS (ESI-TOF)  $m/z$ : calcd for  $\text{C}_{20}\text{H}_{21}\text{N}_3\text{O}_2\text{Na}^+$  : 358.1526 ( $\text{M} + \text{Na}$ ) $^+$ , found 358.1537.

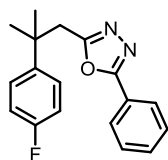

**2-(2-(4-Fluorophenyl)-2-methylpropyl)-5-phenyl-1,3,4-oxadiazole (3f):** white solid (42.6 mg, 72%).  $^1\text{H}$  NMR (600 MHz,  $\text{CDCl}_3$ )  $\delta$  7.85 – 7.82 (m, 2H), 7.52 – 7.43 (m, 3H), 7.37 – 7.32 (m, 2H), 7.01 (t,  $J = 8.7$  Hz, 2H), 3.21 (s, 2H), 1.50 (s, 6H).  $^{13}\text{C}$  NMR (151 MHz,  $\text{CDCl}_3$ ) 164.71, 164.67, 161.33 (d,  $J = 245.2$  Hz), 142.89 (d,  $J = 3.2$  Hz), 131.51, 128.97, 127.24 (d,  $J = 7.7$  Hz), 126.62, 123.87, 115.01 (d,  $J = 21.0$  Hz), 40.11, 37.83, 28.75.  $^{19}\text{F}$  NMR (565 MHz,  $\text{CDCl}_3$ )  $\delta$  -117.07. HRMS (ESI-TOF)  $m/z$ : calcd for  $\text{C}_{18}\text{H}_{17}\text{FN}_2\text{ONa}^+$  : 319.1217 ( $\text{M} + \text{Na}$ ) $^+$ , found 319.1227.

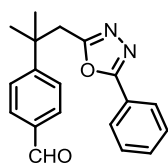

**4-(2-Methyl-1-(5-phenyl-1,3,4-oxadiazol-2-yl)propan-2-yl)benzaldehyde (3g):** yellow solid (27.6 mg, 45%).  $^1\text{H}$  NMR (600 MHz,  $\text{CDCl}_3$ ) 9.99 (s, 1H), 7.88 – 7.83 (m, 2H), 7.82 – 7.77 (m, 2H), 7.60 – 7.55 (m, 2H), 7.52 – 7.45 (m, 1H), 7.45 – 7.41 (m, 2H), 3.28 (s, 2H), 1.56 (s, 6H).  $^{13}\text{C}$  NMR (151 MHz,  $\text{CDCl}_3$ )  $\delta$  191.78, 164.70, 164.31, 154.24, 134.72, 131.59, 129.82, 128.98, 126.58, 126.42, 123.72, 39.64, 38.74, 28.49. HRMS (ESI-TOF)  $m/z$ : calcd for  $\text{C}_{19}\text{H}_{18}\text{N}_2\text{O}_2\text{Na}^+$  : 329.1260 ( $\text{M} + \text{Na}$ ) $^+$ , found 329.1264.

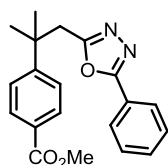

**Methyl-4-(2-methyl-1-(5-phenyl-1,3,4-oxadiazol-2-yl)propan-2-yl)benzoate (3h):** yellow solid (46.5mg, 69%).  $^1\text{H NMR}$  (600 MHz,  $\text{CDCl}_3$ )  $\delta$  8.01 – 7.98 (m, 2H), 7.82 – 7.79 (m, 2H), 7.50 – 7.45 (m, 3H), 7.43 (t,  $J = 7.5$  Hz, 2H), 3.90 (s, 3H), 3.26 (s, 2H), 1.53 (s, 6H).  $^{13}\text{C NMR}$  (151 MHz,  $\text{CDCl}_3$ )  $\delta$  166.82, 164.66, 164.46, 152.48, 131.49, 129.66, 128.93, 128.28, 126.61, 125.71, 123.77, 52.01, 39.67, 38.46, 28.44. HRMS (ESI-TOF)  $m/z$ : calcd for  $\text{C}_{20}\text{H}_{20}\text{N}_2\text{O}_3\text{Na}^+$  : 359.1366 ( $\text{M} + \text{Na}$ ) $^+$ , found 359.1379.

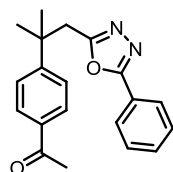

**1-(4-(2-Methyl-1-(5-phenyl-1,3,4-oxadiazol-2-yl)propan-2-yl)phenyl)ethan-1-one (3i):** white solid (38.6 mg, 60%).  $^1\text{H NMR}$  (600 MHz,  $\text{CDCl}_3$ )  $\delta$  7.94 – 7.89 (m, 2H), 7.82 – 7.78 (m, 2H), 7.51 – 7.45 (m, 3H), 7.43 (t,  $J = 7.5$  Hz, 2H), 3.26 (s, 2H), 2.57 (s, 3H), 1.54 (s, 6H).  $^{13}\text{C NMR}$  (151 MHz,  $\text{CDCl}_3$ )  $\delta$  197.61, 164.66, 164.41, 152.65, 135.32, 131.53, 128.93, 128.44, 126.58, 125.91, 123.75, 39.64, 38.50, 28.44, 26.54. HRMS (ESI-TOF)  $m/z$ : calcd for  $\text{C}_{20}\text{H}_{20}\text{N}_2\text{O}_2\text{Na}^+$  : 343.1417 ( $\text{M} + \text{Na}$ ) $^+$ , found 343.1428.

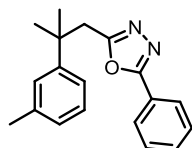

**2-(2-Methyl-2-(*m*-tolyl)propyl)-5-phenyl-1,3,4-oxadiazole (3j):** yellow solid (53.8 mg, 92%).  $^1\text{H NMR}$  (600 MHz,  $\text{CDCl}_3$ )  $\delta$  7.86 – 7.82 (m, 2H), 7.51 – 7.47 (m, 1H), 7.47 – 7.43 (m, 2H), 7.25 – 7.18 (m, 3H), 7.05 (dd,  $J = 7.1, 1.9$  Hz, 1H), 3.22 (s, 2H), 2.34 (s, 3H), 1.50 (s, 6H).  $^{13}\text{C NMR}$  (151 MHz,  $\text{CDCl}_3$ )  $\delta$  165.02, 164.63, 147.31, 137.78, 131.41, 128.91, 128.24, 127.05, 126.66, 126.36, 124.00, 122.61, 40.01, 38.03, 28.50, 21.65. HRMS (ESI-TOF)  $m/z$ : calcd for  $\text{C}_{19}\text{H}_{20}\text{N}_2\text{ONa}^+$  : 315.1468 ( $\text{M} + \text{Na}$ ) $^+$ , found 315.1475.

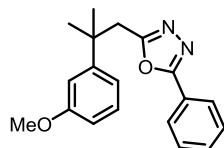

**2-(2-(3-Methoxyphenyl)-2-methylpropyl)-5-phenyl-1,3,4-oxadiazole (3k):** yellow oil ( 53.6 mg, 87%).  $^1\text{H NMR}$  (600 MHz,  $\text{CDCl}_3$ )  $\delta$  7.88 – 7.83 (m, 2H), 7.52 – 7.46 (m, 1H), 7.47 – 7.43 (m, 2H), 7.26 (t,  $J = 8.0$  Hz, 1H), 6.99 (dd,  $J = 7.8, 1.0$  Hz, 1H), 6.94 (t,  $J = 2.2$  Hz, 1H), 6.78 (dd,  $J = 8.2, 2.3$  Hz, 1H), 3.79 (s, 3H), 3.22 (s, 2H), 1.50 (s, 6H).  $^{13}\text{C NMR}$  (151 MHz,  $\text{CDCl}_3$ )  $\delta$  164.89, 164.65, 159.58, 149.11, 131.41, 129.29, 128.90, 126.66, 123.96, 118.07, 112.32, 110.93, 55.18, 39.92, 38.17, 28.46. HRMS (ESI-TOF)  $m/z$ : calcd for  $\text{C}_{19}\text{H}_{20}\text{N}_2\text{O}_2\text{Na}^+$  : 331.1417 ( $\text{M} + \text{Na}$ ) $^+$ , found 331.1423.

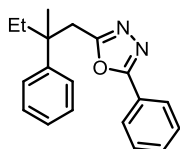

**2-(2-Methyl-2-phenylbutyl)-5-phenyl-1,3,4-oxadiazole (3l):** white solid (48.4 mg, 83%).  $^1\text{H}$  NMR (600 MHz,  $\text{CDCl}_3$ )  $\delta$  7.83 – 7.77 (m, 2H), 7.51 – 7.45 (m, 1H), 7.46-7.40 (m, 2H), 7.39 – 7.28 (m, 4H), 7.25 – 7.19 (m, 1H), 3.26 (d,  $J = 14.4$  Hz, 1H), 3.22 (d,  $J = 14.4$  Hz, 1H), 2.03 – 1.97 (m, 1H), 1.80 – 1.71 (m, 1H), 1.46 (s, 3H), 0.77 (t,  $J = 7.5$  Hz, 3H).  $^{13}\text{C}$  NMR (151 MHz,  $\text{CDCl}_3$ )  $\delta$  164.93, 164.59, 145.24, 131.36, 128.87, 128.27, 126.62, 126.24, 126.17, 123.94, 41.58, 38.90, 34.75, 23.56, 8.63. HRMS (ESI-TOF)  $m/z$ : calcd for  $\text{C}_{19}\text{H}_{20}\text{N}_2\text{ONa}^+$  : 315.1468 (M + Na) $^+$ , found 315.1477.

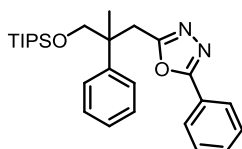

**2-(2-Methyl-2-phenyl-3-((triisopropylsilyloxy)propyl))-5-phenyl-1,3,4-oxadiazole (3m):** yellow oil (65.2 mg, 72%).  $^1\text{H}$  NMR (600 MHz,  $\text{CDCl}_3$ )  $\delta$  7.81 – 7.75 (m, 2H), 7.48 – 7.45 (m, 1H), 7.43 – 7.40 (m, 4H), 7.33 (t,  $J = 7.7$  Hz, 2H), 7.23 (t,  $J = 7.3$  Hz, 1H), 3.95 (d,  $J = 9.6$  Hz, 1H), 3.79 (d,  $J = 9.6$  Hz, 1H), 3.47 (d,  $J = 15$  Hz, 1H), 3.44 (d,  $J = 15$  Hz, 1H), 1.54 (s, 3H), 1.15 – 1.06 (m, 3H), 1.06 – 1.02 (m, 18H).  $^{13}\text{C}$  NMR (151 MHz,  $\text{CDCl}_3$ )  $\delta$  165.20, 164.50, 143.68, 131.29, 128.82, 128.14, 126.59, 126.56, 126.48, 123.96, 72.00, 43.81, 34.05, 21.99, 17.96, 11.93. HRMS (ESI-TOF)  $m/z$ : calcd for  $\text{C}_{27}\text{H}_{38}\text{N}_2\text{O}_2\text{SiNa}^+$  : 473.2595 (M + Na) $^+$ , found 473.2610.

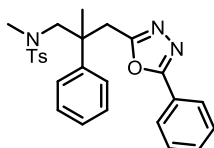

**N-(2-(2-methyl-2-phenyl-3-(5-phenyl-1,3,4-oxadiazol-2-yl)propyl)benzenesulfonamide (3n):** colorless oil (89.6 mg, 97%).  $^1\text{H}$  NMR (600 MHz,  $\text{CDCl}_3$ )  $\delta$  7.81 (d,  $J = 7.0$  Hz, 1H), 7.64 (d,  $J = 8.2$  Hz, 2H), 7.48-7.46 (m, 1H), 7.45 – 7.39 (m, 4H), 7.33 – 7.30 (m, 4H), 7.23 (t,  $J = 7.4$  Hz, 1H), 3.65 (d,  $J = 15.2$  Hz, 1H), 3.49 (d,  $J = 14.0$  Hz, 1H), 3.38 (d,  $J = 15.2$  Hz, 1H), 3.18 (d,  $J = 14.0$  Hz, 1H), 2.41 (s, 3H), 2.27 (s, 3H), 1.66 (s, 3H).  $^{13}\text{C}$  NMR (151 MHz,  $\text{CDCl}_3$ )  $\delta$  164.56, 164.45, 143.51, 143.12, 134.17, 131.40, 129.70, 128.86, 128.50, 127.48, 126.99, 126.61, 126.51, 123.81, 62.13, 42.50, 38.09, 35.66, 22.83, 21.44. HRMS (ESI-TOF)  $m/z$ : calcd for  $\text{C}_{26}\text{H}_{27}\text{N}_3\text{O}_3\text{SNa}^+$  : 484.1664 (M + Na) $^+$ , found 484.1682.

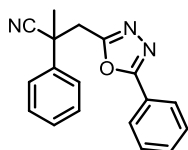

**2-Methyl-2-phenyl-3-(5-phenyl-1,3,4-oxadiazol-2-yl)propanenitrile (3o):** white solid (46.4 mg, 80%).  $^1\text{H}$  NMR (600 MHz,  $\text{CDCl}_3$ )  $\delta$  7.98 – 7.94 (m, 2H), 7.55 – 7.47 (m, 5H), 7.41 (t,  $J = 7.7$  Hz, 2H), 7.35 (t,  $J = 7.3$  Hz, 1H), 3.58 (dd,  $J = 15, 3.6$  Hz, 2H), 1.92 (s, 3H).  $^{13}\text{C}$  NMR (151 MHz,  $\text{CDCl}_3$ )  $\delta$  165.47, 161.71, 138.09, 131.87, 129.26, 129.06, 128.65, 126.92, 125.37, 123.46, 121.86, 40.82, 38.00,



26.50. HRMS (ESI-TOF)  $m/z$ : calcd for  $C_{18}H_{15}N_3ONa^+$  : 312.1107 ( $M + Na$ )<sup>+</sup>, found 312.1117.

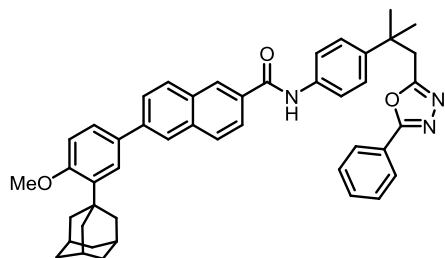

**6-((3r,5r,7r)-Adamantan-1-yl)-4-methoxyphenyl)-N-(4-(2-methyl-1-(5-phenyl-1,3,4-oxadiazol-2-yl)propan-2-yl)phenyl)-2-naphthamide (3p)**: white solid (96.6 mg, 70%). <sup>1</sup>H NMR (600 MHz, CDCl<sub>3</sub>) δ 8.37 (s, 1H), 8.11 (s, 1H), 8.02 (s, 1H), 7.98 – 7.90 (m, 3H), 7.90 – 7.85 (m, 2H), 7.81 (dd,  $J = 8.5, 1.8$  Hz, 1H), 7.66 (d,  $J = 8.3$  Hz, 2H), 7.61 (d,  $J = 2.4$  Hz, 1H), 7.54 (dd,  $J = 8.3, 2.3$  Hz, 1H), 7.49-7.43 (m, 3H), 7.40 (d,  $J = 8.4$  Hz, 2H), 7.00 (d,  $J = 8.3$  Hz, 1H), 3.91 (s, 3H), 3.23 (s, 2H), 2.19 (s, 6H), 2.11 (s, 3H), 1.81 (s, 6H), 1.69 (s, 2H), 1.52 (s, 6H). <sup>13</sup>C NMR (151 MHz, CDCl<sub>3</sub>) δ 165.76, 164.90, 164.69, 158.90, 143.43, 141.04, 139.00, 136.33, 135.27, 132.46, 131.58, 131.46, 131.32, 129.29, 128.96, 128.76, 127.33, 126.73, 126.71, 126.30, 125.91, 125.68, 124.71, 123.88, 123.86, 120.21, 112.10, 55.15, 40.59, 39.98, 37.92, 37.19, 37.10, 29.08, 28.57. HRMS (ESI-TOF)  $m/z$ : calcd for  $C_{46}H_{46}N_3O_3^+$  : 688.3534 ( $M + H$ )<sup>+</sup>, found 688.3551.

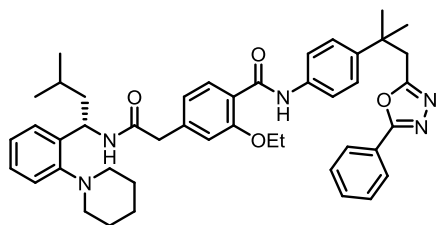

**(S)-2-ethoxy-4-(2-((3-methyl-1-(2-(piperidin-1-yl)phenyl)butyl)amino)-2-oxoethyl)-N-(4-(2-methyl-1-(5-phenyl-1,3,4-oxadiazol-2-yl)propan-2-yl)phenyl)benzamide (3q)**: yellow solid (90.0 mg, 62%). <sup>1</sup>H NMR (600 MHz, CDCl<sub>3</sub>) δ 10.05 (s, 1H), 8.22 (d,  $J = 7.9$  Hz, 1H), 7.88 – 7.82 (m, 2H), 7.64 – 7.59 (m, 2H), 7.47 – 7.41 (m, 3H), 7.40 – 7.35 (m, 2H), 7.24 – 7.16 (m, 2H), 7.11 (dd,  $J = 7.6, 1.5$  Hz, 1H), 7.05 (td,  $J = 7.2, 1.8$  Hz, 1H), 6.96 (dd,  $J = 8.0, 1.5$  Hz, 2H), 6.92 (d,  $J = 1.5$  Hz, 1H), 5.42-5.35 (m, 1H), 4.20 – 4.04 (m, 2H), 3.56 (s, 2H), 3.22 (s, 2H), 2.94 (s, 2H), 2.61 (s, 2H), 1.94 (s, 1H), 1.77 – 1.68 (m, 2H), 1.67 – 1.55 (m, 4H), 1.56 – 1.48 (m, 10H), 1.43 (m, 1H), 0.91 (dd,  $J = 6.6, 1.6$  Hz, 6H). <sup>13</sup>C NMR (151 MHz, CDCl<sub>3</sub>) δ 168.73, 164.89, 164.63, 162.86, 156.77, 152.46, 142.86, 141.10, 138.64, 136.77, 132.70, 131.38, 128.89, 127.86, 127.71, 126.64, 126.20, 125.00, 123.83, 122.78, 122.17, 120.24, 119.85, 113.01, 65.00, 49.84, 46.61, 43.95, 39.96, 37.83, 28.52, 26.71, 25.28, 24.07, 22.72, 22.47, 14.77. HRMS (ESI-TOF)  $m/z$ : calcd for  $C_{45}H_{54}N_5O_4^+$  : 728.4170 ( $M + H$ )<sup>+</sup> found 728.4190.

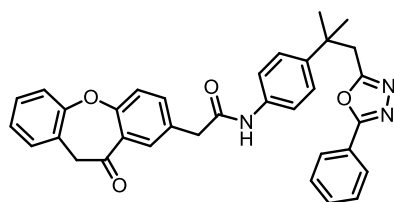

**N-(4-(2-methyl-1-(5-phenyl-1,3,4-oxadiazol-2-yl)propan-2-yl)phenyl)-2-(11-oxo-10,11-dihydrodibenzo[*b,f*]oxepin-2-yl)acetamide (3r):** yellow oil (71.5 mg, 66%).  $^1\text{H}$  NMR (600 MHz,  $\text{CDCl}_3$ )  $\delta$  8.17 (d,  $J = 2.4$  Hz, 1H), 7.89 (dd,  $J = 7.8, 1.3$  Hz, 1H), 7.84 – 7.81 (m, 2H), 7.58 (td,  $J = 7.5, 1.4$  Hz, 1H), 7.52 – 7.44 (m, 3H), 7.43 – 7.37 (m, 5H), 7.32 – 7.29 (m, 2H), 7.24 (s, 1H), 7.08 (d,  $J = 8.4$  Hz, 1H), 5.21 (s, 2H), 3.73 (s, 2H), 3.18 (s, 2H), 1.47 (s, 6H).  $^{13}\text{C}$  NMR (151 MHz,  $\text{CDCl}_3$ )  $\delta$  190.82, 168.80, 164.85, 164.65, 160.69, 143.35, 140.30, 136.35, 135.91, 135.46, 132.90, 132.45, 131.46, 129.47, 129.31, 128.93, 128.34, 127.87, 126.66, 126.11, 125.30, 123.80, 121.65, 119.91, 73.63, 43.57, 39.92, 37.84, 28.53. HRMS (ESI-TOF)  $m/z$ : calcd for  $\text{C}_{34}\text{H}_{29}\text{N}_3\text{O}_4\text{Na}^+$  : 566.2050 ( $\text{M} + \text{Na}$ ) $^+$ , found 566.2063.

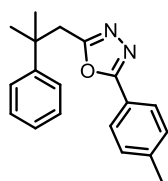

**2-(2-Methyl-2-phenylpropyl)-5-(*p*-tolyl)-1,3,4-oxadiazole (3u) :** yellow oil (53.0 mg, 91%).  $^1\text{H}$  NMR (600 MHz,  $\text{CDCl}_3$ )  $\delta$  7.73 – 7.69 (m, 2H), 7.41 – 7.38 (m, 2H), 7.35 – 7.31 (m, 2H), 7.25 – 7.21 (m, 3H), 3.22 (s, 2H), 2.40 (s, 3H), 1.51 (s, 6H).  $^{13}\text{C}$  NMR (151 MHz,  $\text{CDCl}_3$ )  $\delta$  164.77, 164.64, 147.30, 141.89, 129.59, 128.33, 126.60, 126.29, 125.57, 121.19, 40.01, 38.11, 28.49, 21.56. HRMS (ESI-TOF)  $m/z$ : calcd for  $\text{C}_{19}\text{H}_{20}\text{N}_2\text{ONa}^+$  : 315.1468 ( $\text{M} + \text{Na}$ ) $^+$ , found 315.1478.

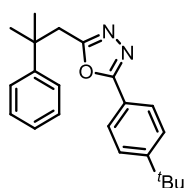

**2-(4-(*Tert*-butyl)phenyl)-5-(2-methyl-2-phenylpropyl)-1,3,4-oxadiazole (3v):** yellow solid (57.6 mg, 86%).  $^1\text{H}$  NMR (600 MHz,  $\text{CDCl}_3$ )  $\delta$  7.76 (d,  $J = 8.2$  Hz, 2H), 7.46 (d,  $J = 8.2$  Hz, 2H), 7.40 (d,  $J = 7.7$  Hz, 2H), 7.34 (t,  $J = 7.6$  Hz, 2H), 7.24 (t,  $J = 7.4$  Hz, 1H), 3.23 (s, 2H), 1.51 (s, 6H), 1.34 (s, 9H).  $^{13}\text{C}$  NMR (151 MHz,  $\text{CDCl}_3$ )  $\delta$  164.67, 164.65, 154.95, 147.27, 128.31, 126.46, 126.28, 125.85, 125.54, 121.11, 39.96, 38.08, 34.97, 31.06, 28.48. HRMS (ESI-TOF)  $m/z$ : calcd for  $\text{C}_{22}\text{H}_{26}\text{N}_2\text{ONa}^+$  : 357.1937 ( $\text{M} + \text{Na}$ ) $^+$ , found 357.1952.

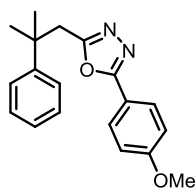

**2-(4-Methoxyphenyl)-5-(2-methyl-2-phenylpropyl)-1,3,4-oxadiazole (3w):** yellow oil (49.2 mg,

80%).  $^1\text{H}$  NMR (600 MHz,  $\text{CDCl}_3$ )  $\delta$  7.78 – 7.72 (m, 2H), 7.42 – 7.36 (m, 2H), 7.33 (t,  $J = 7.7$  Hz, 2H), 7.23 (t,  $J = 7.3$  Hz, 1H), 6.96 – 6.91 (m, 2H), 3.85 (s, 3H), 3.21 (s, 2H), 1.50 (s, 6H).  $^{13}\text{C}$  NMR (151 MHz,  $\text{CDCl}_3$ )  $\delta$  164.52, 164.36, 162.04, 147.30, 128.34, 128.28, 126.24, 125.55, 116.47, 114.29, 55.36, 39.95, 38.06, 28.46. HRMS (ESI-TOF)  $m/z$ : calcd for  $\text{C}_{19}\text{H}_{20}\text{N}_2\text{O}_2\text{Na}^+$ : 331.1417 (M + Na) $^+$ , found 331.1430.

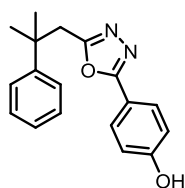

**4-(5-(2-Methyl-2-phenylpropyl)-1,3,4-oxadiazol-2-yl)phenol (3x)**: yellow solid (32.5 mg, 55%).  $^1\text{H}$  NMR (600 MHz,  $(\text{CD}_3)_2\text{SO}$ )  $\delta$  10.25 (s, 1H), 7.60 – 7.54 (m, 2H), 7.44 – 7.37 (m, 2H), 7.30 (t,  $J = 7.6$  Hz, 2H), 7.19 (t,  $J = 7.3$  Hz, 1H), 6.91 – 6.85 (m, 2H), 3.23 (s, 2H), 1.42 (s, 6H).  $^{13}\text{C}$  NMR (151 MHz,  $\text{CDCl}_3$ )  $\delta$  164.04, 163.81, 160.53, 147.27, 128.09, 128.06, 125.98, 125.64, 116.06, 114.20, 38.80, 37.78, 28.44. HRMS (ESI-TOF)  $m/z$ : calcd for  $\text{C}_{18}\text{H}_{18}\text{N}_2\text{O}_2\text{Na}^+$ : 317.1260 (M + Na) $^+$ , found 317.1266.

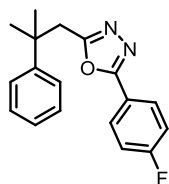

**2-(4-Fluorophenyl)-5-(2-methyl-2-phenylpropyl)-1,3,4-oxadiazole (3y)**: white solid (47.0 mg, 79%).  $^1\text{H}$  NMR (600 MHz,  $\text{CDCl}_3$ )  $\delta$  7.82 – 7.78 (m, 2H), 7.40 – 7.38 (m, 2H), 7.35 – 7.32 (m, 2H), 7.26 – 7.20 (m, 1H), 7.15 – 7.10 (m, 2H), 3.23 (s, 2H), 1.51 (s, 6H).  $^{13}\text{C}$  NMR (151 MHz,  $\text{CDCl}_3$ )  $\delta$  164.92, 164.56 (d,  $J = 252.9$  Hz), 163.81, 147.15, 128.87 (d,  $J = 8.8$  Hz), 128.33, 126.33, 125.57, 120.25 (d,  $J = 3.4$  Hz), 116.21 (d,  $J = 22.1$  Hz), 40.01, 38.13, 28.50.  $^{19}\text{F}$  NMR (565 MHz,  $\text{CDCl}_3$ )  $\delta$  -107.30. HRMS (ESI-TOF)  $m/z$ : calcd for  $\text{C}_{18}\text{H}_{17}\text{FN}_2\text{ONa}^+$ : 319.1217 (M + Na) $^+$ , found 319.1226.

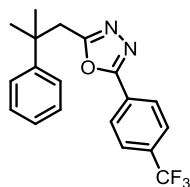

**2-(2-Methyl-2-phenylpropyl)-5-(4-(trifluoromethyl)phenyl)-1,3,4-oxadiazole (3z)**: white solid (50.4 mg, 73%).  $^1\text{H}$  NMR (600 MHz,  $\text{CDCl}_3$ )  $\delta$  7.91 (d,  $J = 8.0$  Hz, 2H), 7.70 (d,  $J = 8.2$  Hz, 2H), 7.41 – 7.38 (m, 2H), 7.37 – 7.31 (m, 2H), 7.27 – 7.21 (m, 1H), 3.26 (s, 2H), 1.52 (s, 6H).  $^{13}\text{C}$  NMR (151 MHz,  $\text{CDCl}_3$ )  $\delta$  165.55, 163.46, 146.97, 133.04 (q,  $J = 32.9$  Hz), 128.36, 127.11, 126.93, 126.39, 125.95 (q,  $J = 3.8$  Hz), 125.57, 123.54 (q,  $J = 272.7$  Hz), 40.08, 38.20, 28.52.  $^{19}\text{F}$  NMR (565 MHz,  $\text{CDCl}_3$ )  $\delta$  -63.08. HRMS (ESI-TOF)  $m/z$ : calcd for  $\text{C}_{19}\text{H}_{17}\text{F}_3\text{N}_2\text{ONa}^+$ : 369.1185 (M + Na) $^+$ , found 369.1199.

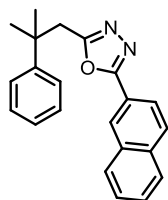

**2-(2-Methyl-2-phenylpropyl)-5-(naphthalen-2-yl)-1,3,4-oxadiazole (3aa):** yellow solid (50.7 mg, 77%).  $^1\text{H}$  NMR (600 MHz,  $\text{CDCl}_3$ )  $\delta$  8.20 (s, 1H), 7.93 (dd,  $J = 8.6, 1.7$  Hz, 1H), 7.89 – 7.86 (m, 2H), 7.86 – 7.82 (m, 1H), 7.58 – 7.50 (m, 2H), 7.44 – 7.40 (m, 2H), 7.35 (t,  $J = 7.8$  Hz, 2H), 7.29 – 7.23 (m, 1H), 3.26 (s, 2H), 1.53 (s, 6H).  $^{13}\text{C}$  NMR (151 MHz,  $\text{CDCl}_3$ )  $\delta$  164.95, 164.75, 147.23, 134.47, 132.71, 128.80, 128.67, 128.33, 127.84, 127.75, 126.97, 126.92, 126.27, 125.60, 122.96, 121.11, 40.05, 38.14, 28.49. HRMS (ESI-TOF)  $m/z$ : calcd for  $\text{C}_{22}\text{H}_{20}\text{N}_2\text{ONa}^+$  : 351.1468 ( $\text{M} + \text{Na}$ ) $^+$ , found 351.1475.

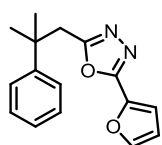

**2-(Furan-2-yl)-5-(2-methyl-2-phenylpropyl)-1,3,4-oxadiazole (3ab):** yellow oil (41.3 mg, 77%).  $^1\text{H}$  NMR (600 MHz,  $\text{CDCl}_3$ )  $\delta$  7.58 (dd,  $J = 1.8, 0.8$  Hz, 1H), 7.39 – 7.37 (m, 2H), 7.34 – 7.31 (m, 2H), 7.25 – 7.19 (m, 1H), 6.93 (dd,  $J = 3.5, 0.8$  Hz, 1H), 6.54 (dd,  $J = 3.5, 1.8$  Hz, 1H), 3.21 (s, 2H), 1.50 (s, 6H).  $^{13}\text{C}$  NMR (151 MHz,  $\text{CDCl}_3$ )  $\delta$  164.26, 157.54, 147.13, 145.41, 139.48, 128.33, 126.34, 125.46, 113.51, 111.93, 39.72, 38.11, 28.41. HRMS (ESI-TOF)  $m/z$ : calcd for  $\text{C}_{16}\text{H}_{16}\text{N}_2\text{O}_2\text{Na}^+$  : 291.1104 ( $\text{M} + \text{Na}$ ) $^+$ , found 291.1114.

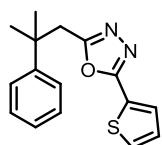

**2-(2-Methyl-2-phenylpropyl)-5-(thiophen-2-yl)-1,3,4-oxadiazole (3ac):** white solid (43.7 mg, 77%).  $^1\text{H}$  NMR (600 MHz,  $\text{CDCl}_3$ )  $\delta$  7.50 – 7.47 (m, 2H), 7.41 – 7.36 (m, 2H), 7.35 – 7.31 (m, 2H), 7.26 – 7.19 (m, 1H), 7.10 (dd,  $J = 5.0, 3.7$  Hz, 1H), 3.21 (s, 2H), 1.51 (s, 6H).  $^{13}\text{C}$  NMR (151 MHz,  $\text{CDCl}_3$ )  $\delta$  164.33, 160.87, 147.13, 129.74, 129.31, 128.33, 127.96, 126.35, 125.53, 125.27, 39.87, 38.09, 28.45. HRMS (ESI-TOF)  $m/z$ : calcd for  $\text{C}_{16}\text{H}_{16}\text{N}_2\text{OSNa}^+$  : 307.0876 ( $\text{M} + \text{Na}$ ) $^+$ , found 307.0883.

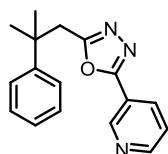

**2-(2-Methyl-2-phenylpropyl)-5-(pyridin-3-yl)-1,3,4-oxadiazole (3ad):** yellow solid (39.2 mg, 70%).  $^1\text{H}$  NMR (600 MHz,  $\text{CDCl}_3$ )  $\delta$  8.96 (d,  $J = 2.5$  Hz, 1H), 8.71 (dd,  $J = 4.9, 1.7$  Hz, 1H), 8.11 (dt,  $J = 8.0, 1.9$  Hz, 1H), 7.41 – 7.35 (m, 3H), 7.34 – 7.31 (m, 2H), 7.26 – 7.20 (m, 1H), 3.25 (s, 2H), 1.52 (s, 6H).  $^{13}\text{C}$  NMR (151 MHz,  $\text{CDCl}_3$ )  $\delta$  165.44, 162.51, 152.13, 147.61, 146.88, 133.82, 128.35, 126.42, 125.53, 123.63, 120.36, 40.02, 38.17, 28.51. HRMS (ESI-TOF)  $m/z$ : calcd for  $\text{C}_{17}\text{H}_{17}\text{N}_3\text{ONa}^+$  : 302.1264 ( $\text{M} + \text{Na}$ ) $^+$ , found 302.1269.

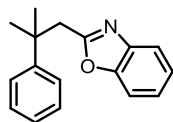

**2-(2-Methyl-2-phenylpropyl)benzo[d]oxazole (3ae):** yellow oil (49.3 mg, 77%).  $^1\text{H}$  NMR (600 MHz,  $\text{CDCl}_3$ )  $\delta$  7.71 – 7.63 (m, 1H), 7.45 – 7.39 (m, 3H), 7.36 – 7.30 (m, 2H), 7.32 – 7.26 (m, 2H), 7.25 – 7.19 (m, 1H), 3.23 (s, 2H), 1.52 (s, 6H).  $^{13}\text{C}$  NMR (151 MHz,  $\text{CDCl}_3$ )  $\delta$  165.01, 150.69, 148.07, 141.26, 128.27, 126.14, 125.46, 124.43, 123.99, 119.64, 110.28, 43.08, 38.49, 28.50. HRMS (ESI-TOF)  $m/z$ : calcd for  $\text{C}_{17}\text{H}_{18}\text{NO}^+$ : 252.1383(M + H) $^+$ , found 252.1389.

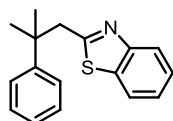

**2-(2-Methyl-2-phenylpropyl)benzo[d]thiazole (3af):** yellow oil (33.7mg, 50%).  $^1\text{H}$  NMR (600 MHz,  $\text{CDCl}_3$ )  $\delta$  7.97 (d,  $J$  = 8.1 Hz, 1H), 7.70 (d,  $J$  = 8.0 Hz, 1H), 7.44 – 7.39 (m, 3H), 7.38 – 7.34 (m, 2H), 7.32 – 7.25 (m, 2H), 3.47 (s, 2H), 1.48 (s, 6H).  $^{13}\text{C}$  NMR (151 MHz,  $\text{CDCl}_3$ )  $\delta$  168.76, 152.46, 147.47, 135.57, 128.38, 126.33, 126.21, 125.62, 124.59, 122.51, 121.26, 48.98, 38.81, 28.79. HRMS (ESI-TOF)  $m/z$ : calcd for  $\text{C}_{17}\text{H}_{18}\text{NS}^+$ : 268.1154 (M + H) $^+$ , found 268.1162.

## 7. References

- (1) Z. Wu, D. Ma, B. Zhou, X. Ji, X. Ma, X. Wang, Y. Zhang, *Angew. Chem, Int. Ed.* 2017, **56**, 12288.
- (2) T. Čarný, R. Rocaboy, A. Clemenceau, O. Baudoin, *Angew. Chem., Int. Ed.*, 2020, **59**, 18980.
- (3) X. Guo, S. He, Z. Xu, L. Chen, Z. Li, B. Song, J. Zuo, Z. Lin, W. Yang, *Nat. Commun.*, 2021, **12**, 1304.
- (4) J. Hérouin, C. Schneider, I. Gillaizeau, C. Hoarau. *Org. Lett.* 2018, **20**, 6027.
- (5) P. Alvarez-Bercedo, A. Flores-Gaspar, A. Correa, R. Martin. *J. Am. Chem. Soc.* 2010, **132**, 466.
- (6) Á. Gutiérrez-Bonet, F. Juliá-Hernández, B. Luis, R. Martin. *J. Am. Chem. Soc.* 2016, **138**, 384.

## 8. NMR Spectra

### 8.1 NMR Spectra of the Substrates

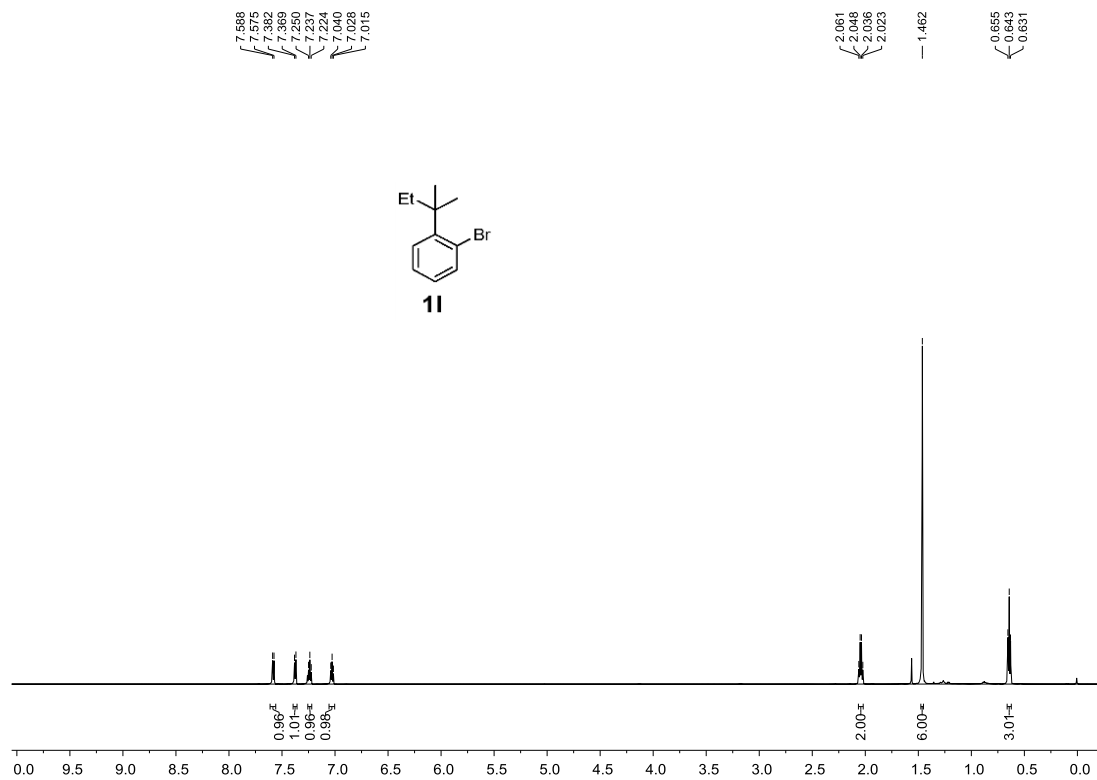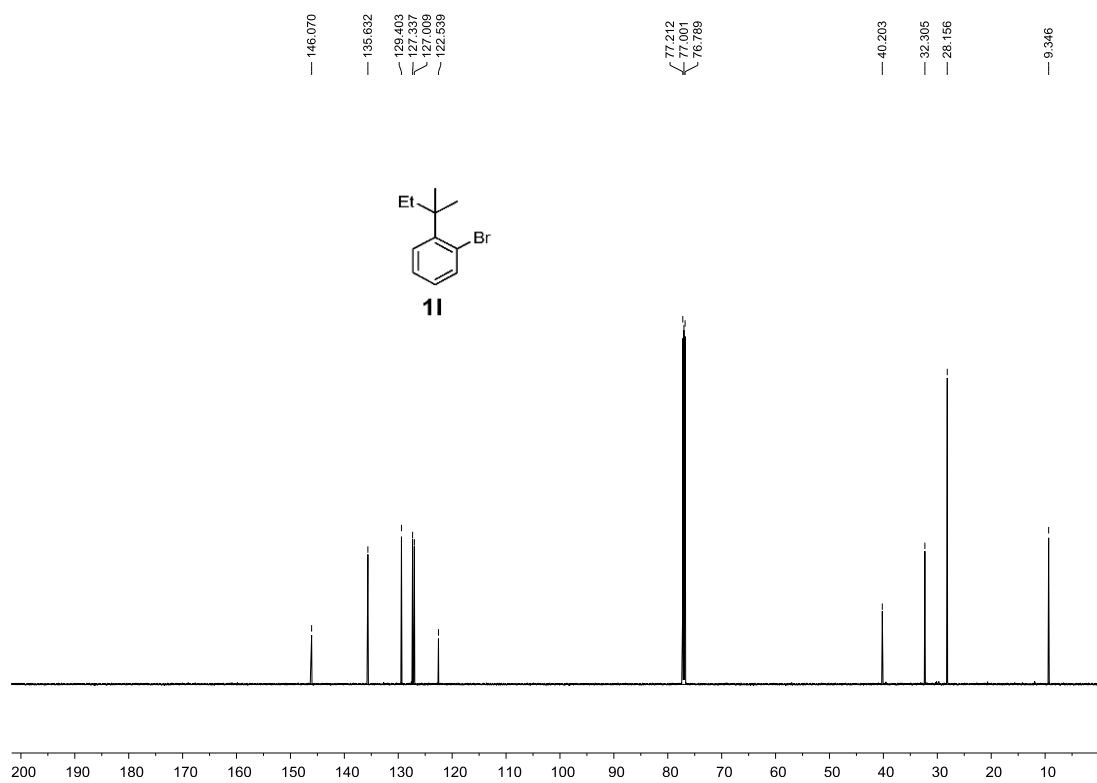

## 8.2 NMR Spectra of the Products

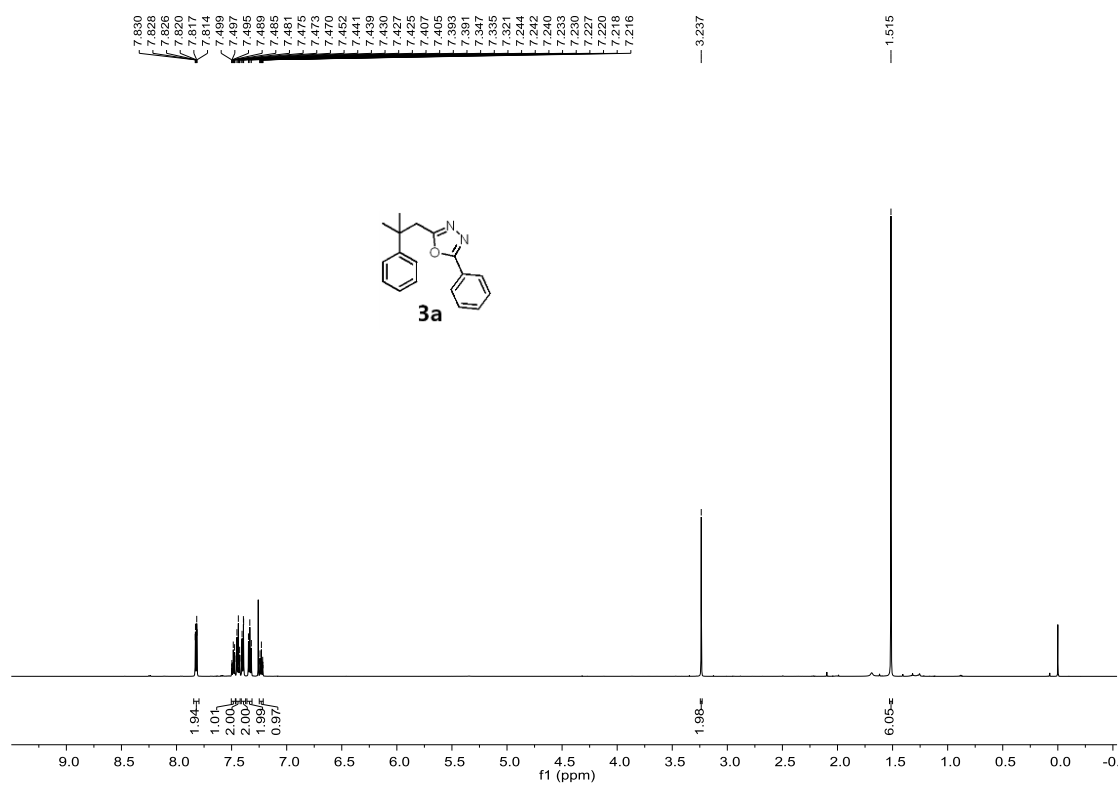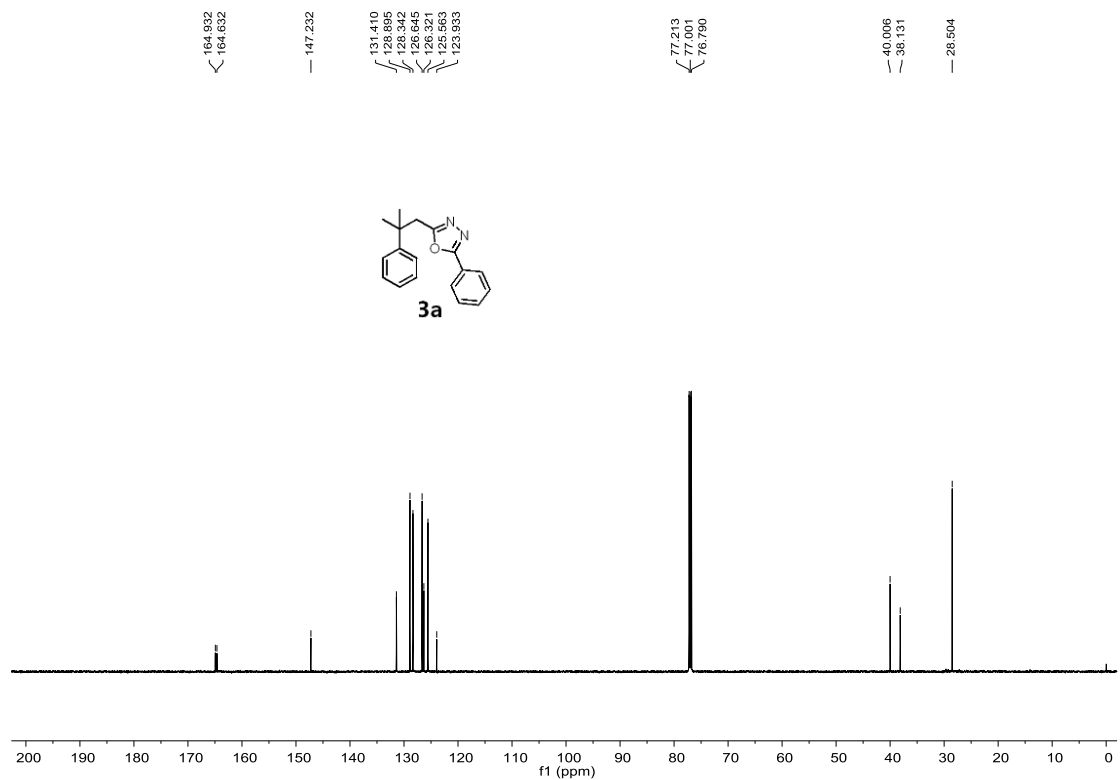





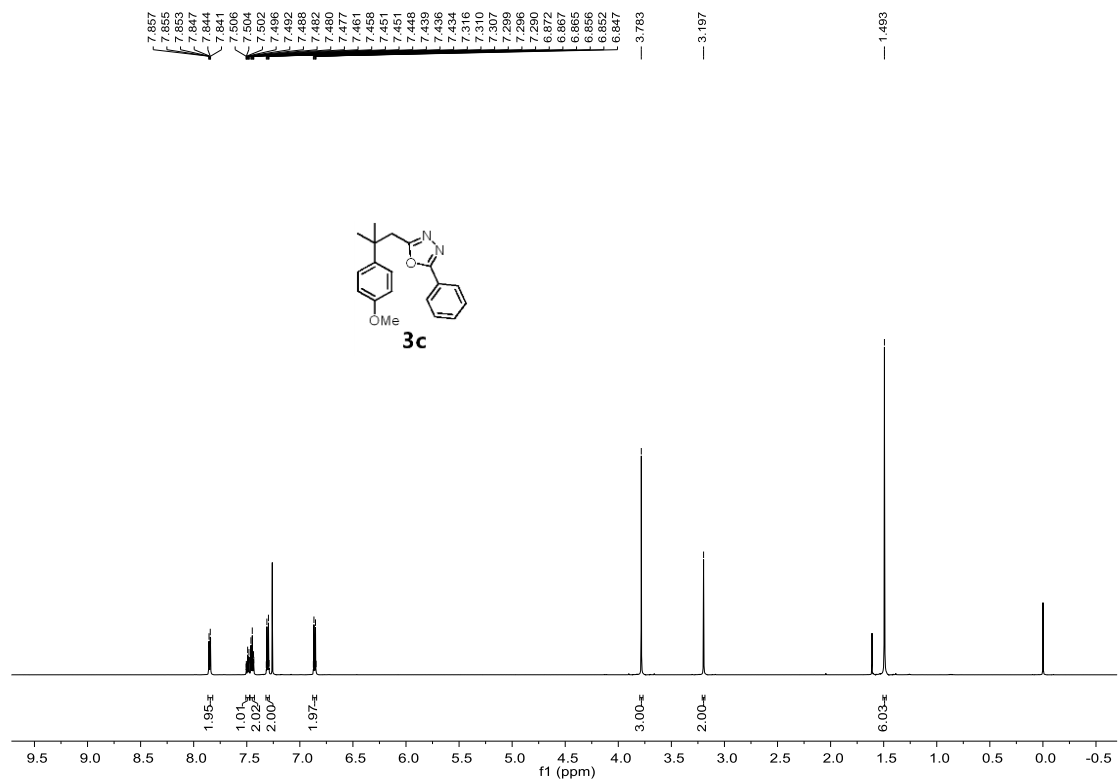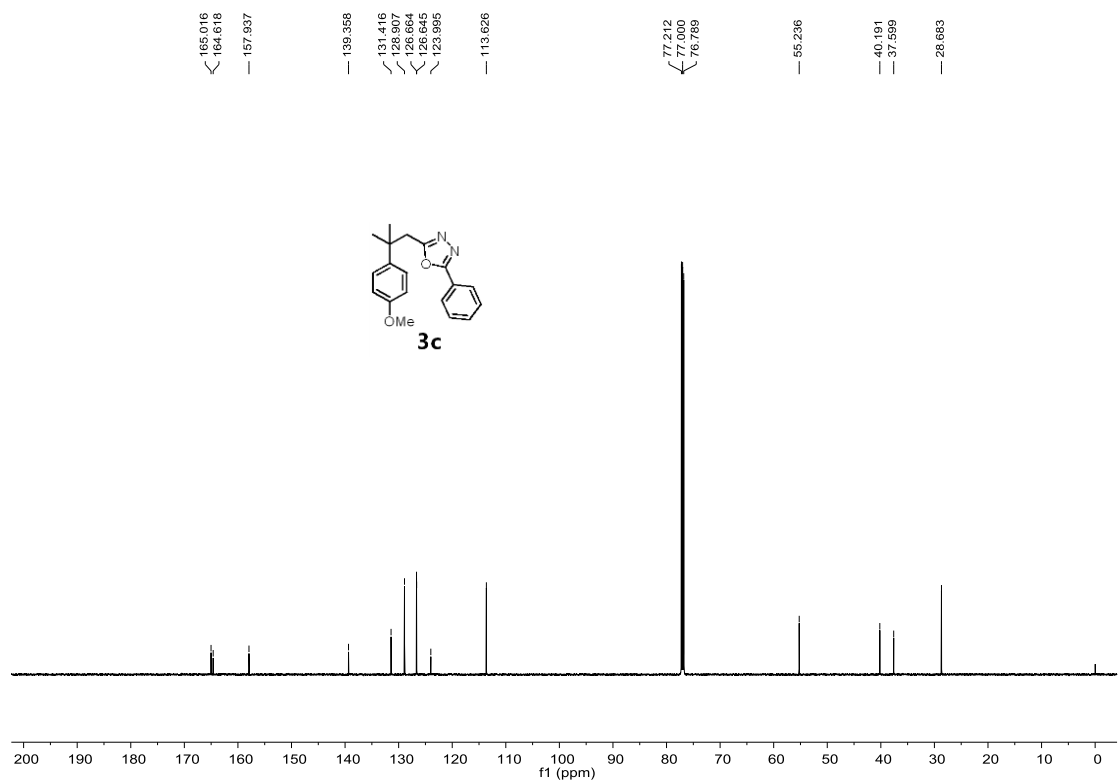

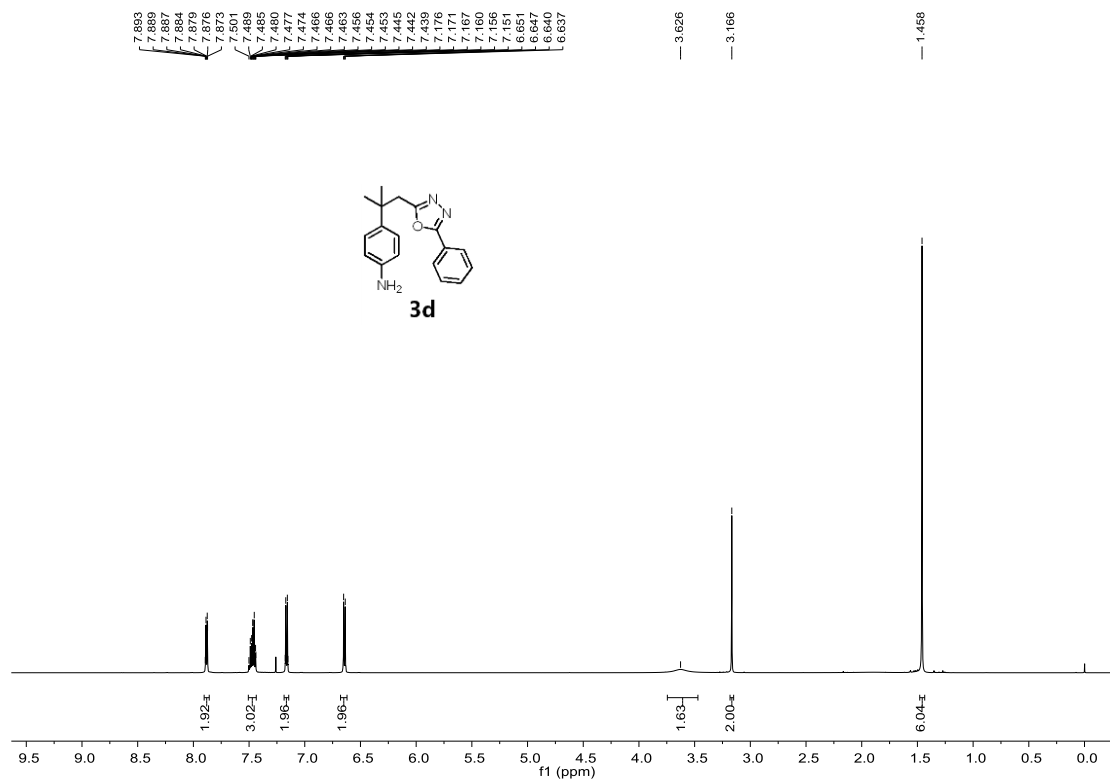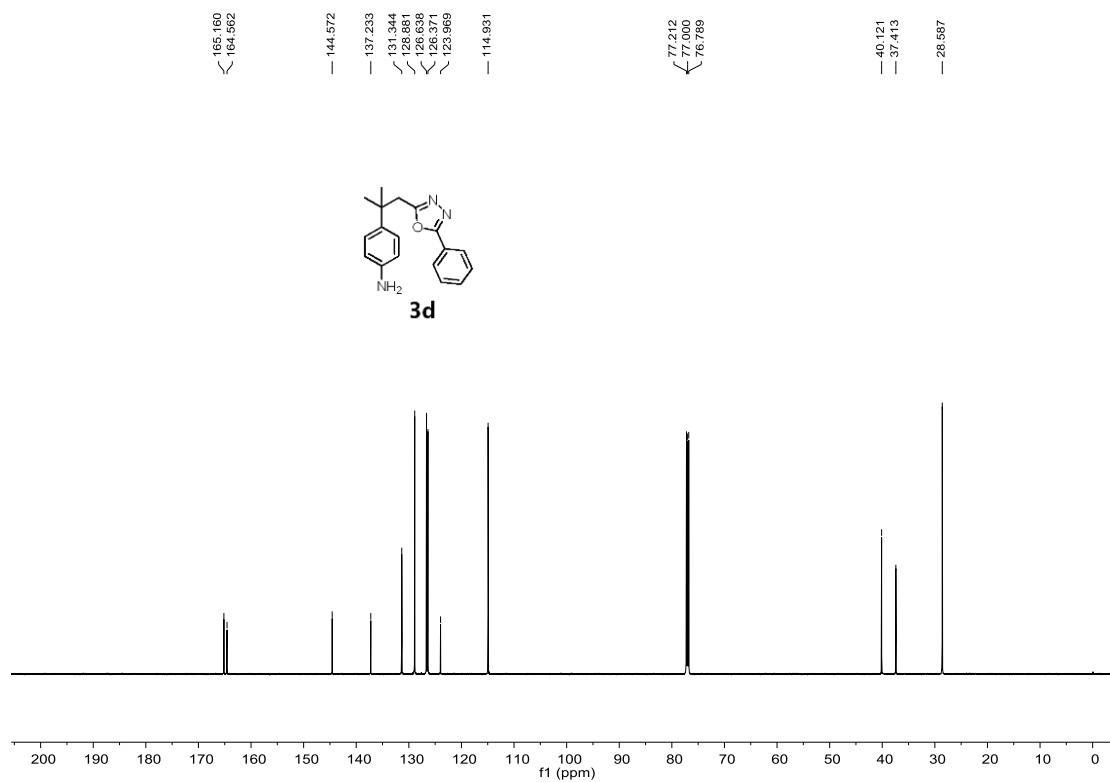

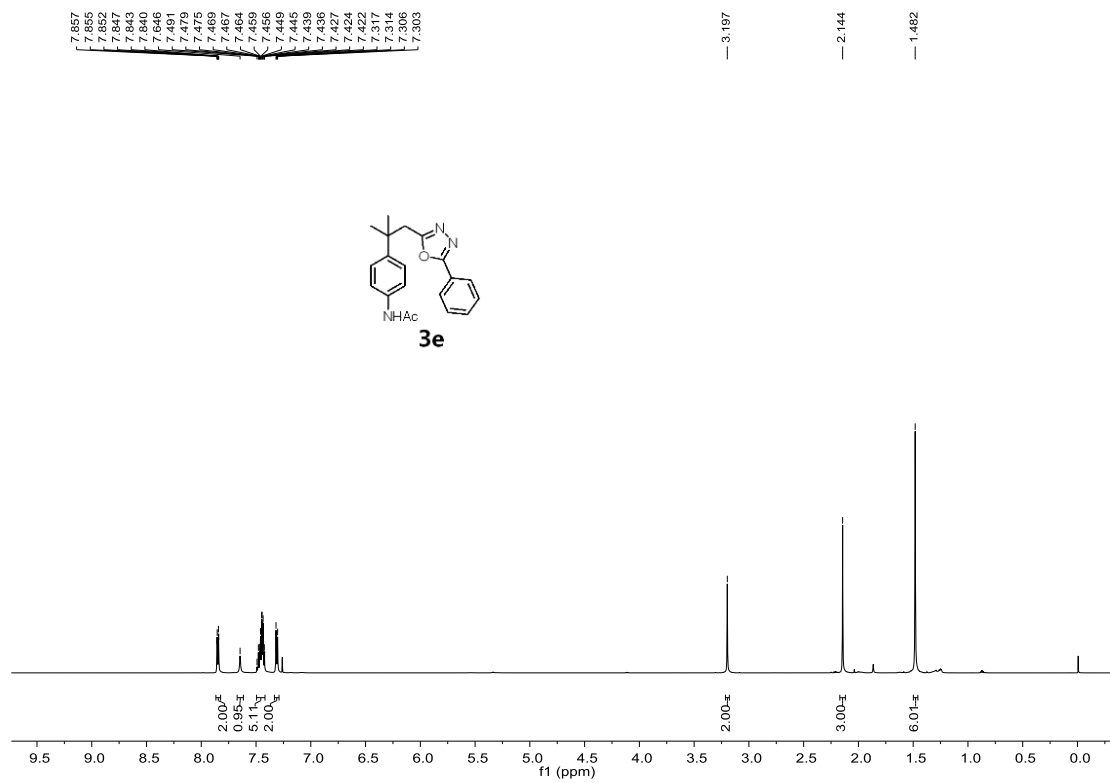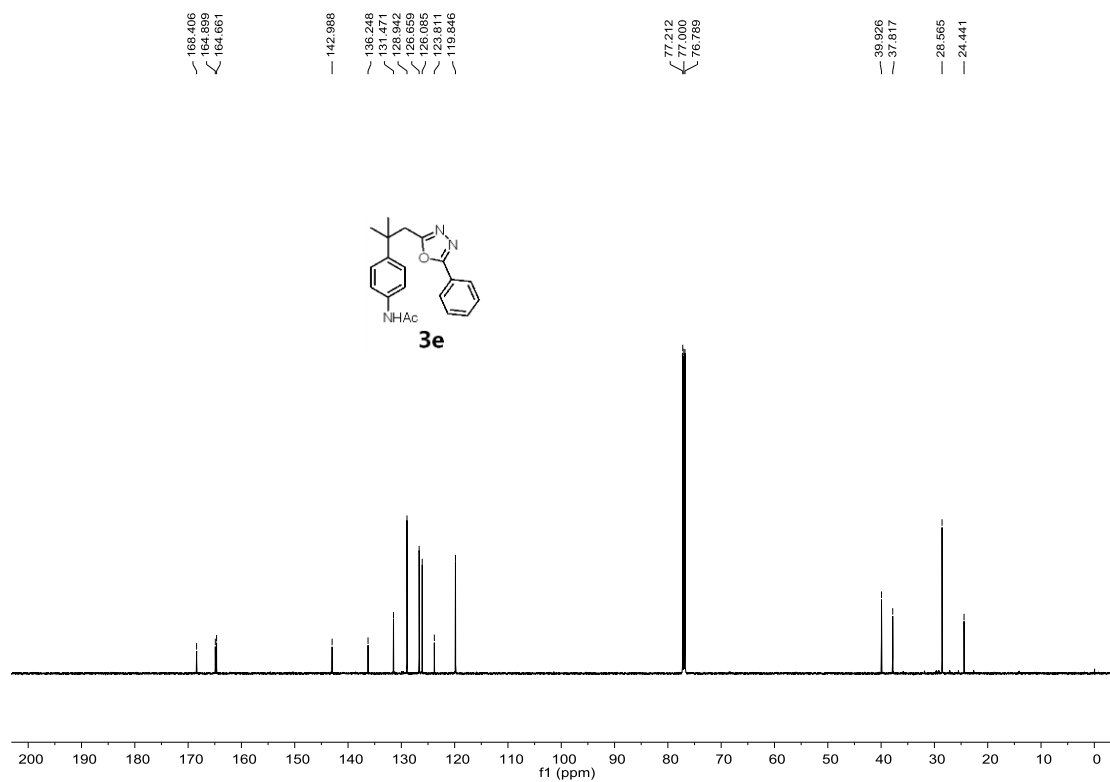

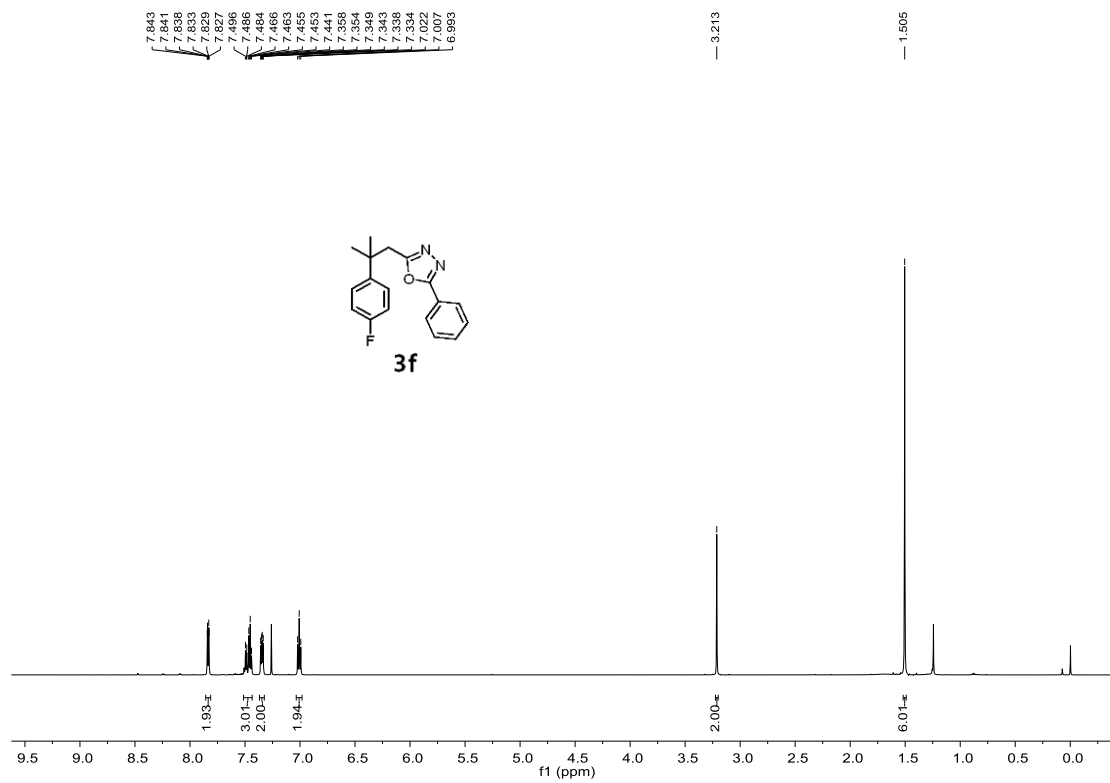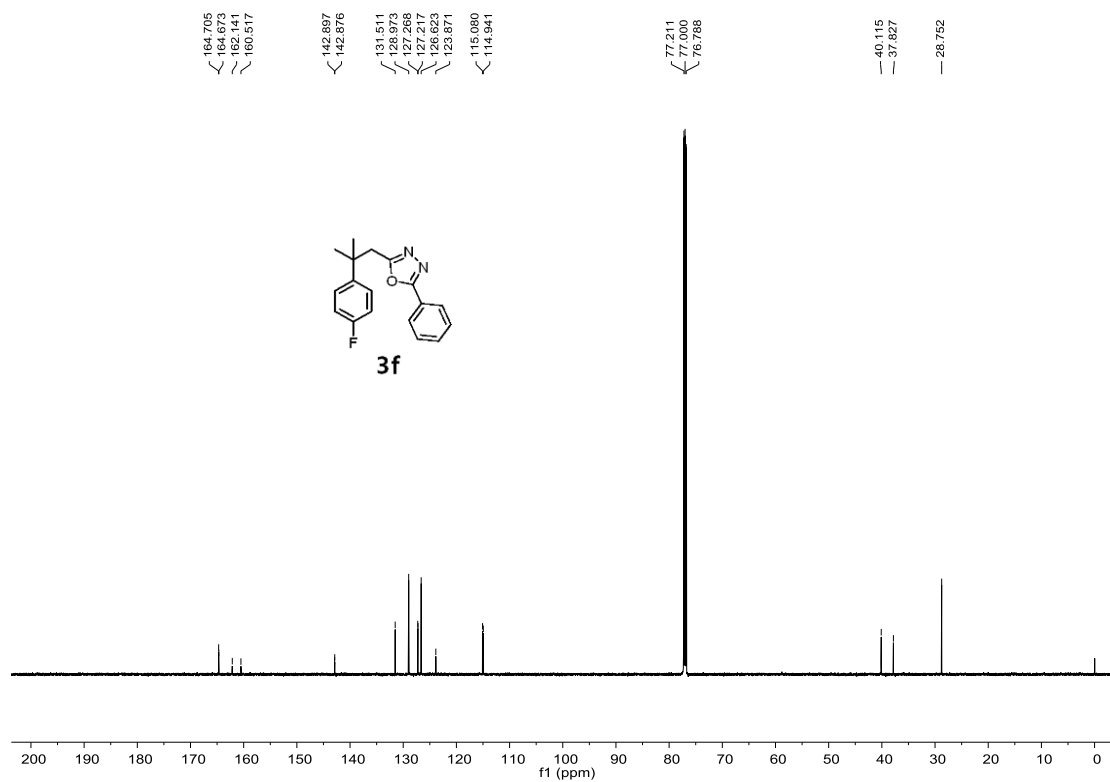

--117.073

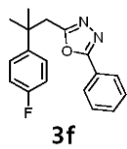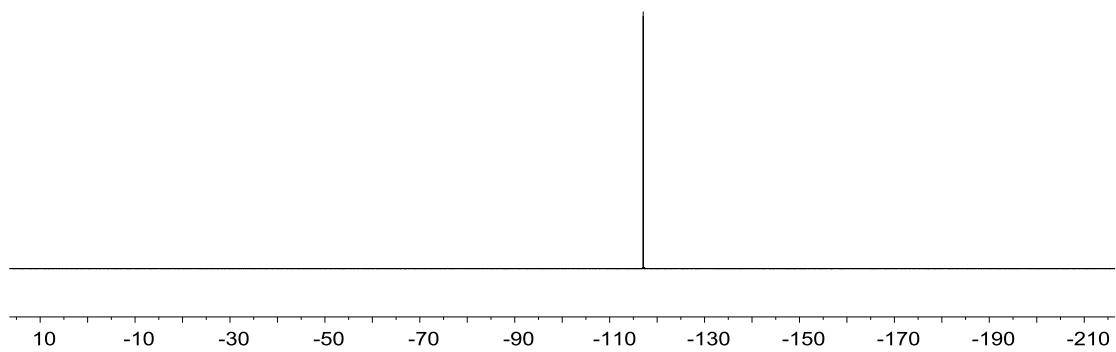

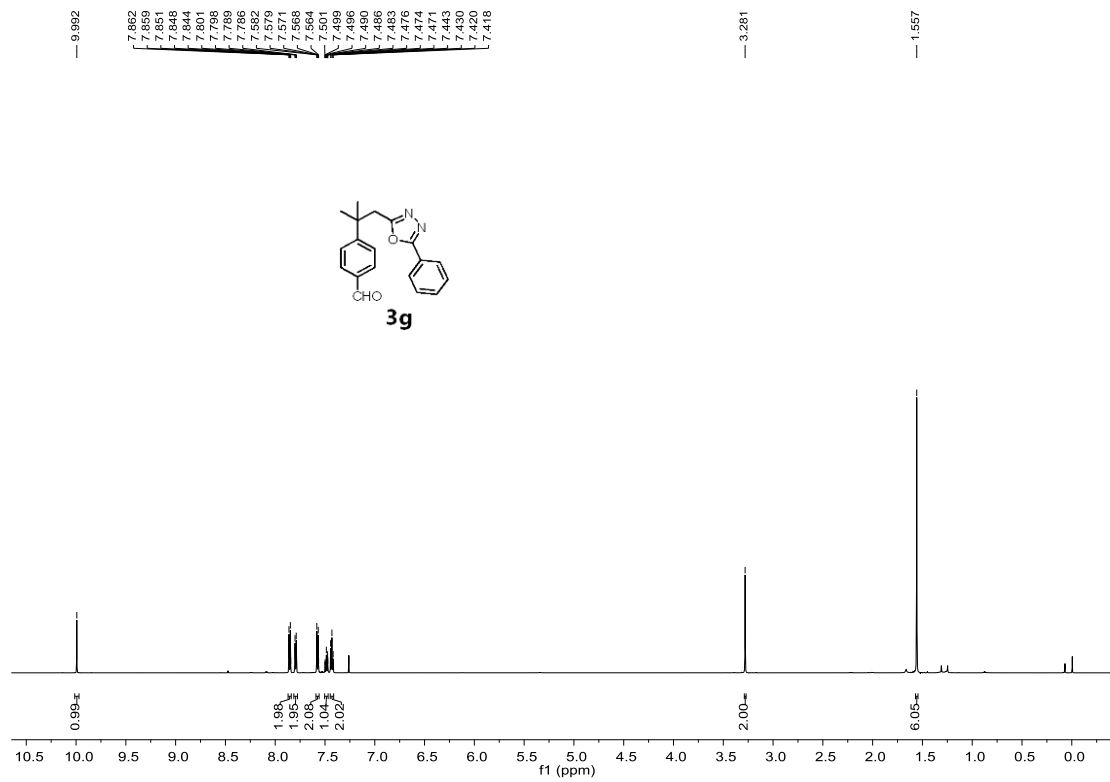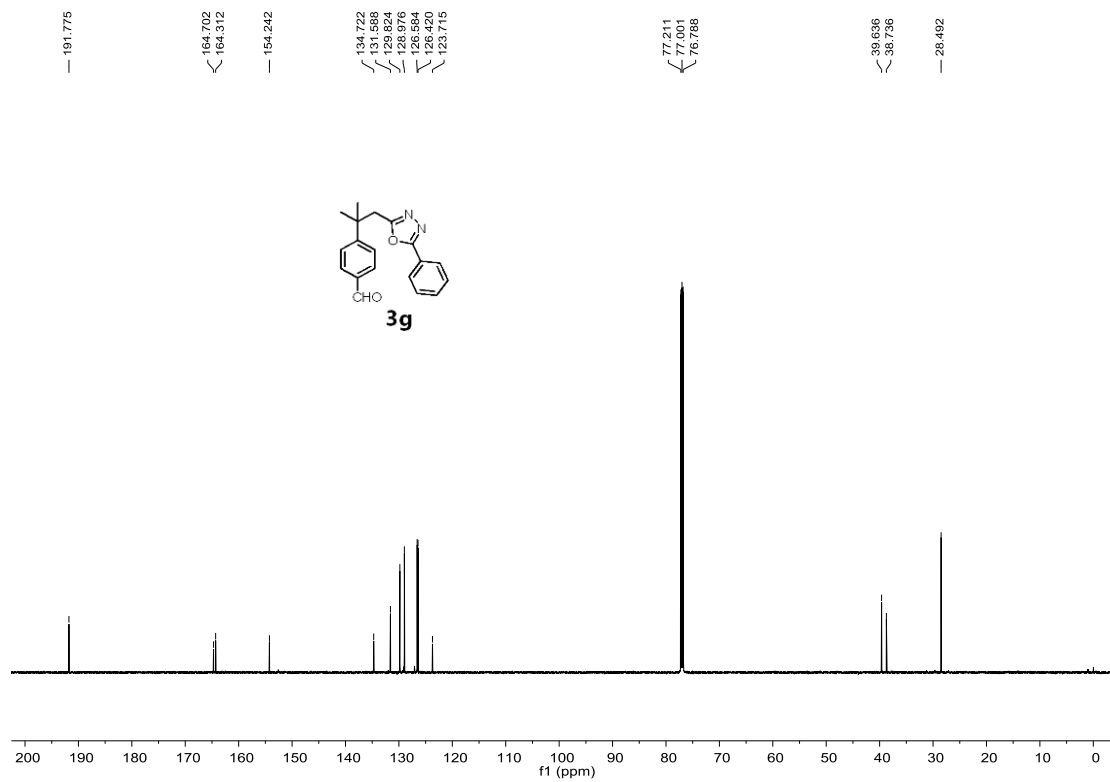

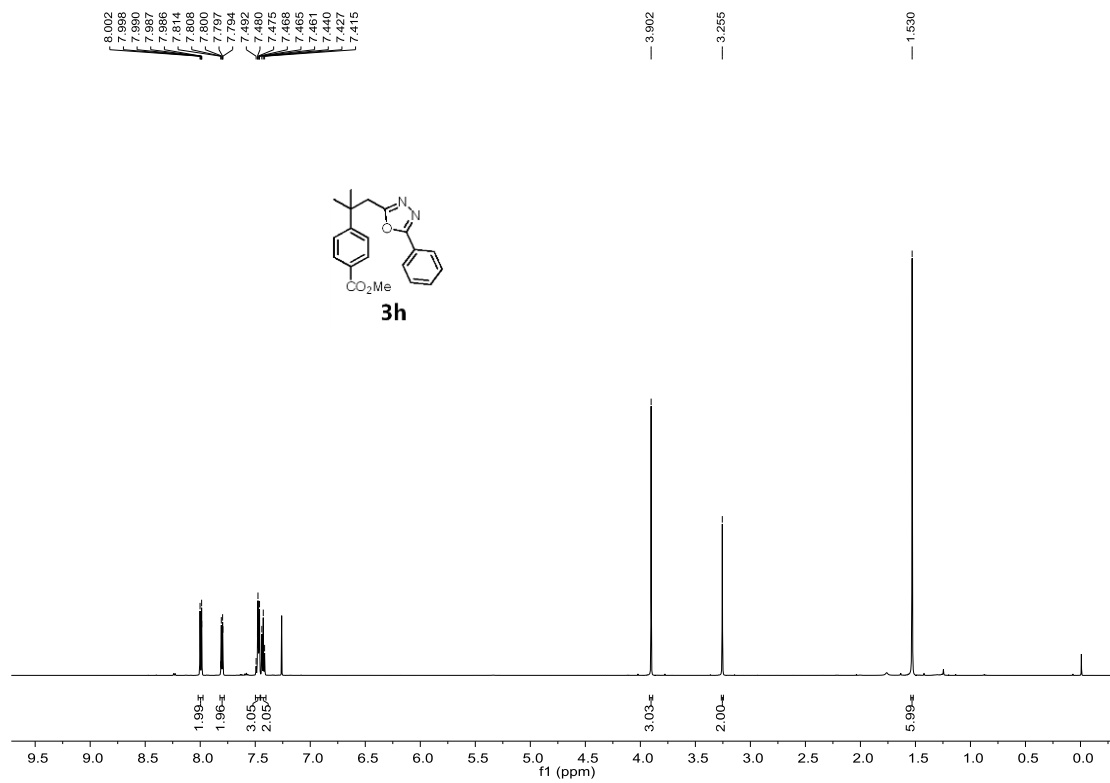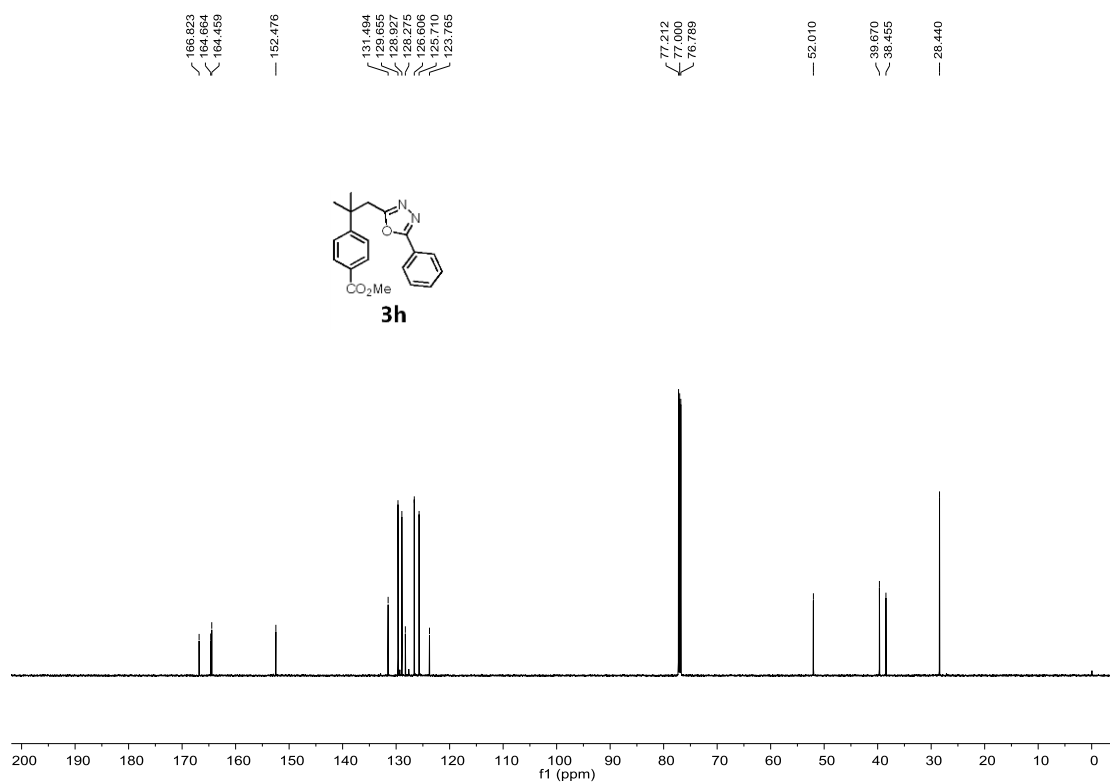

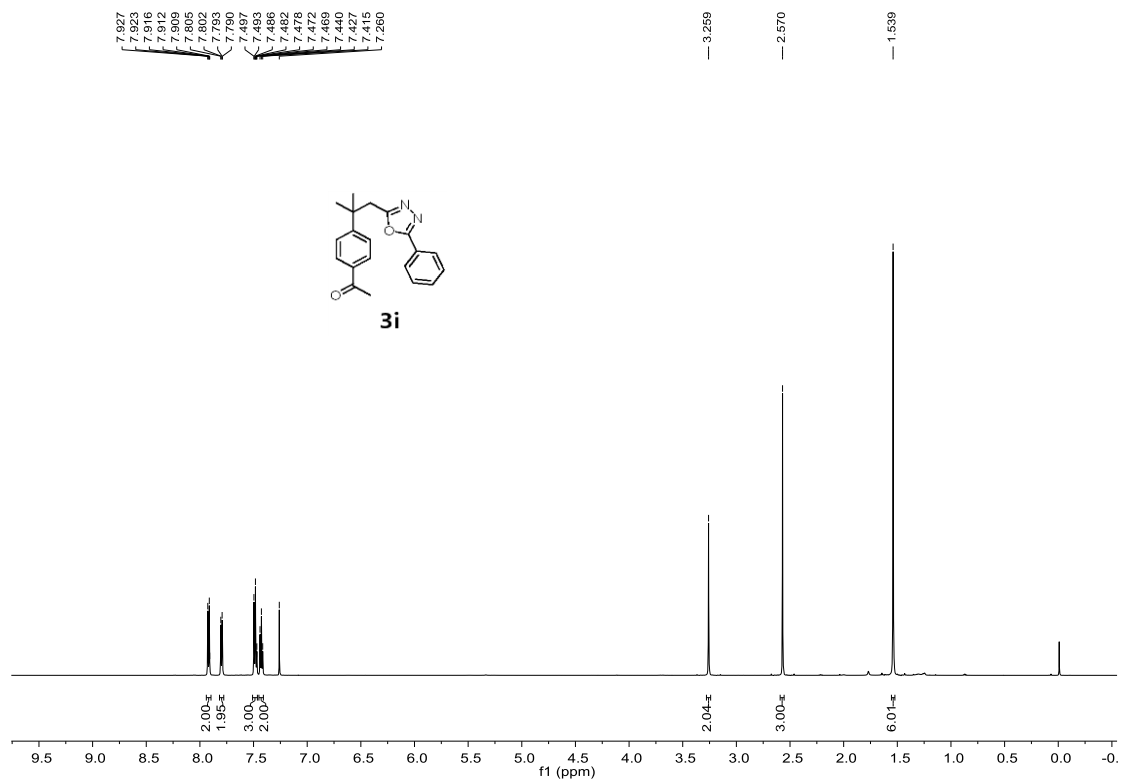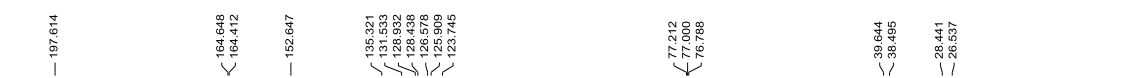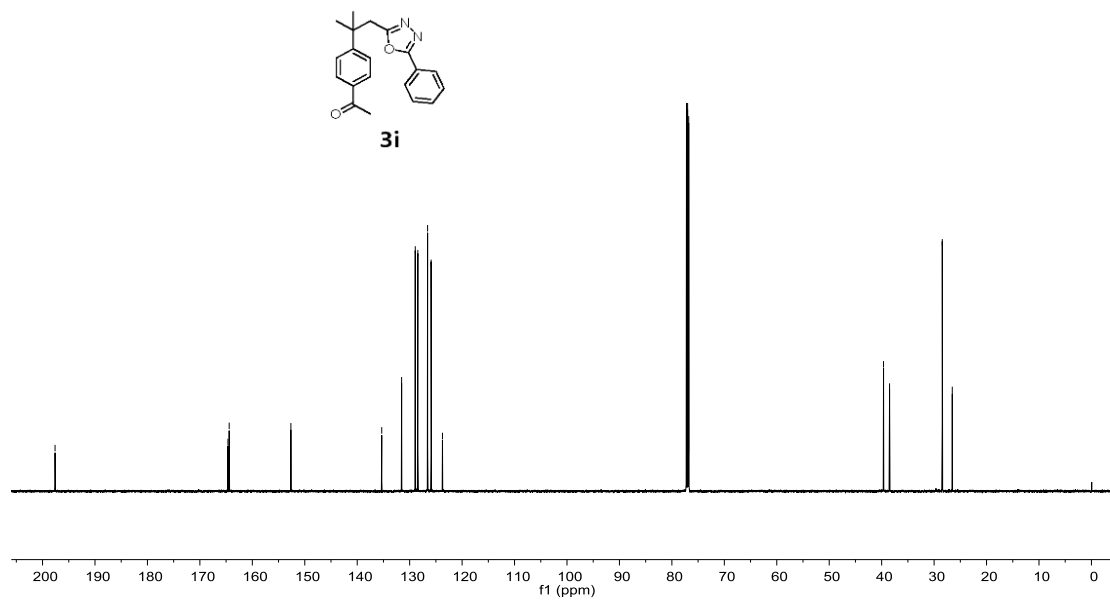



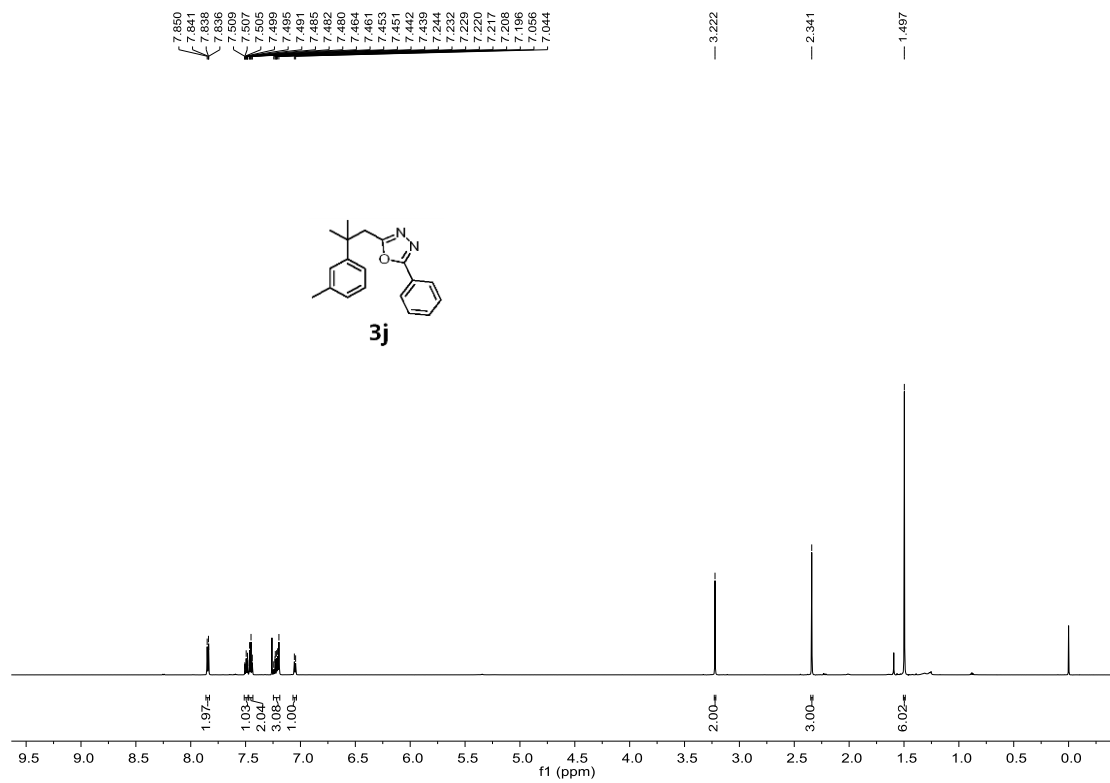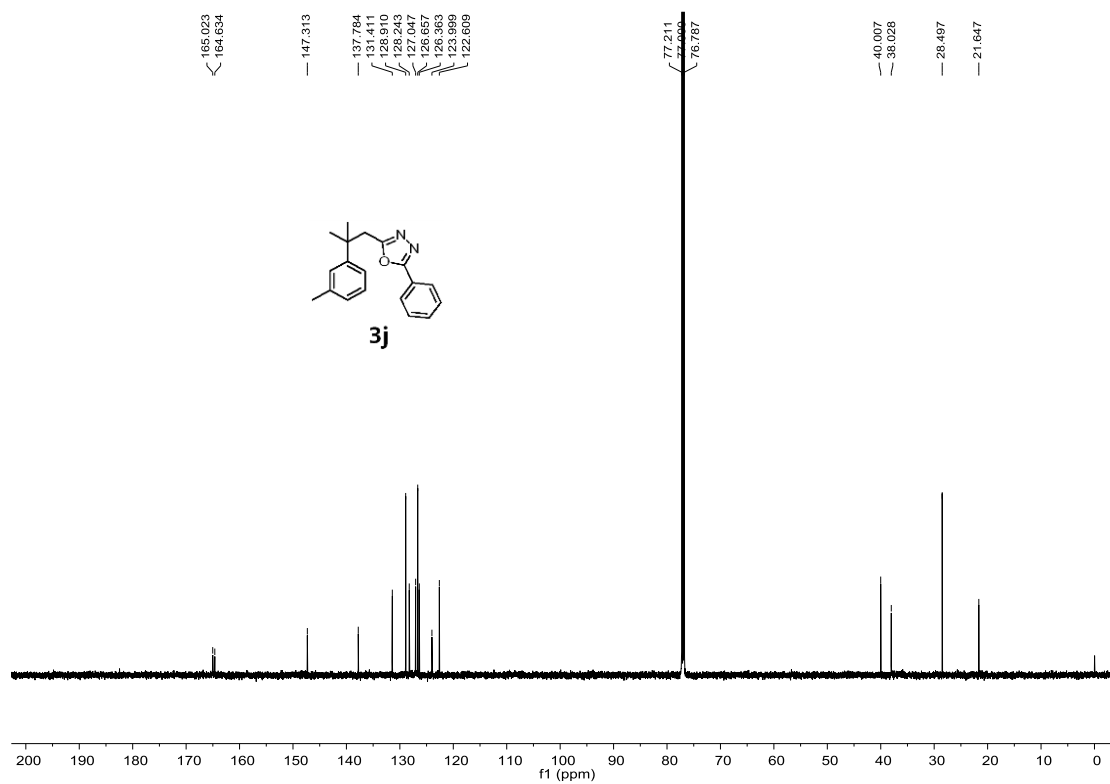

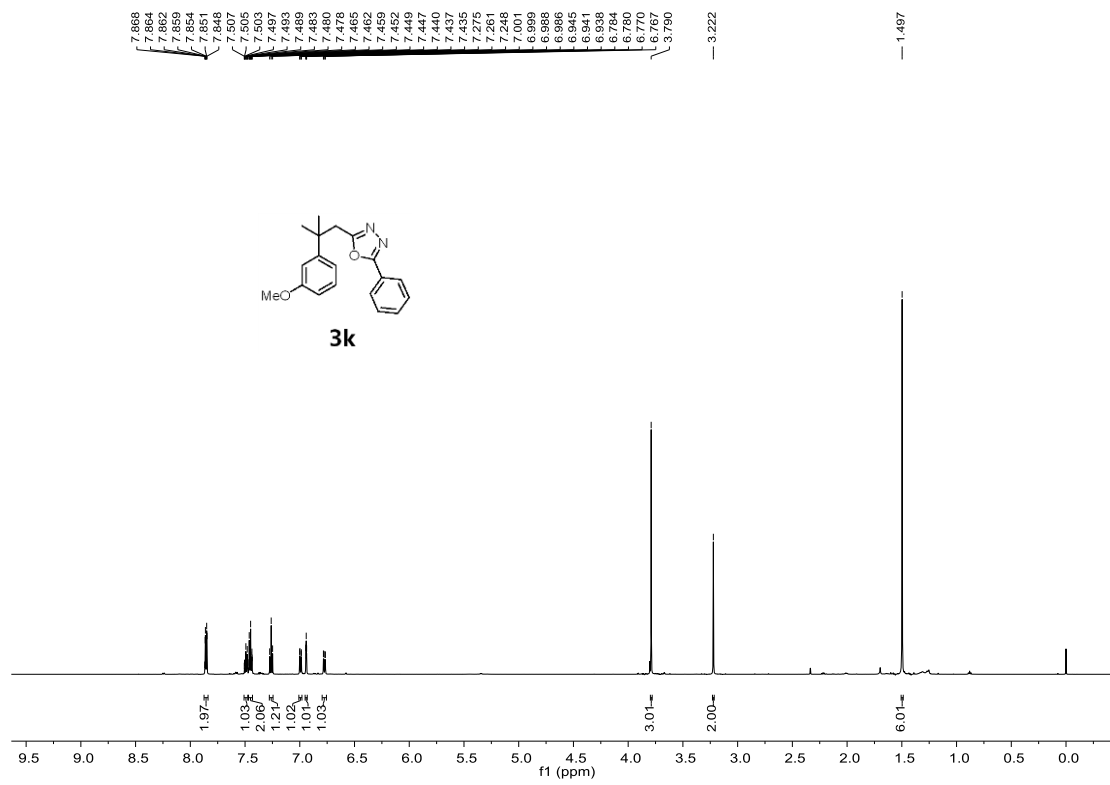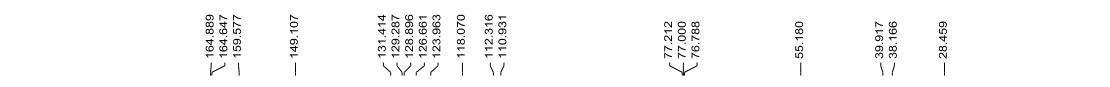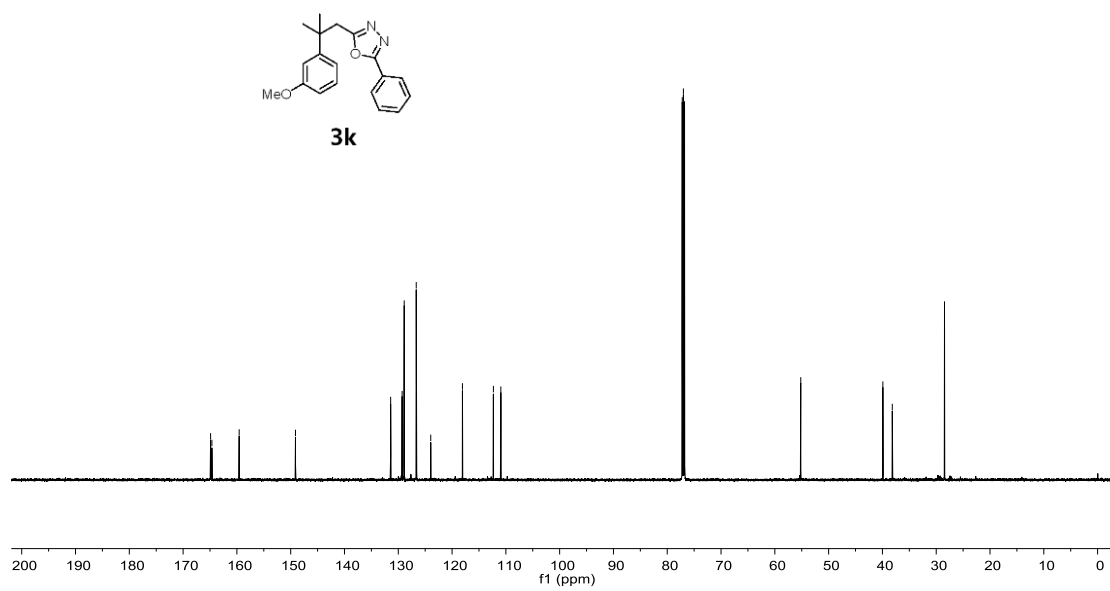

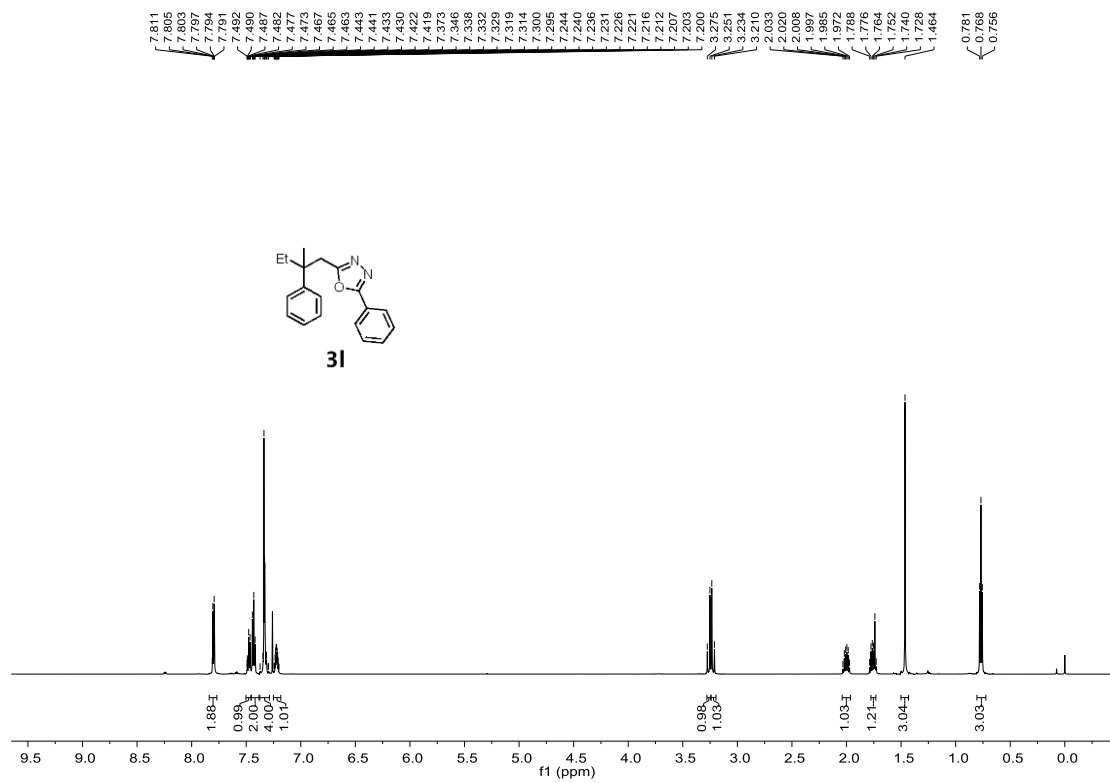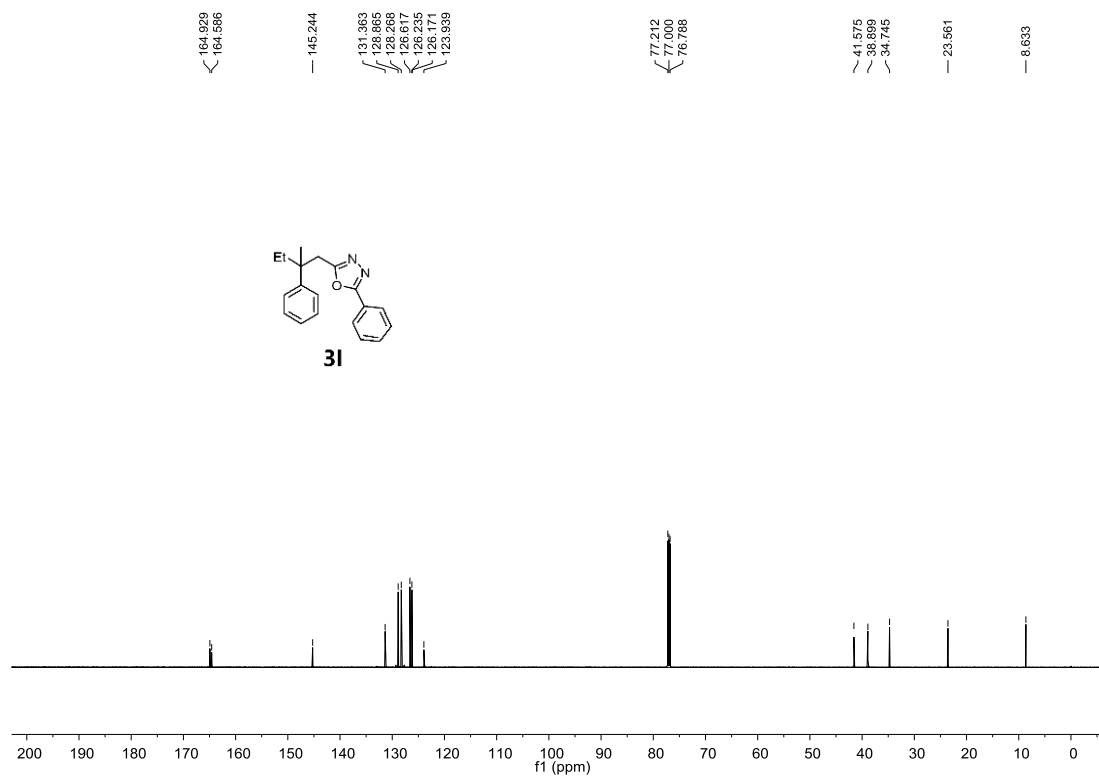

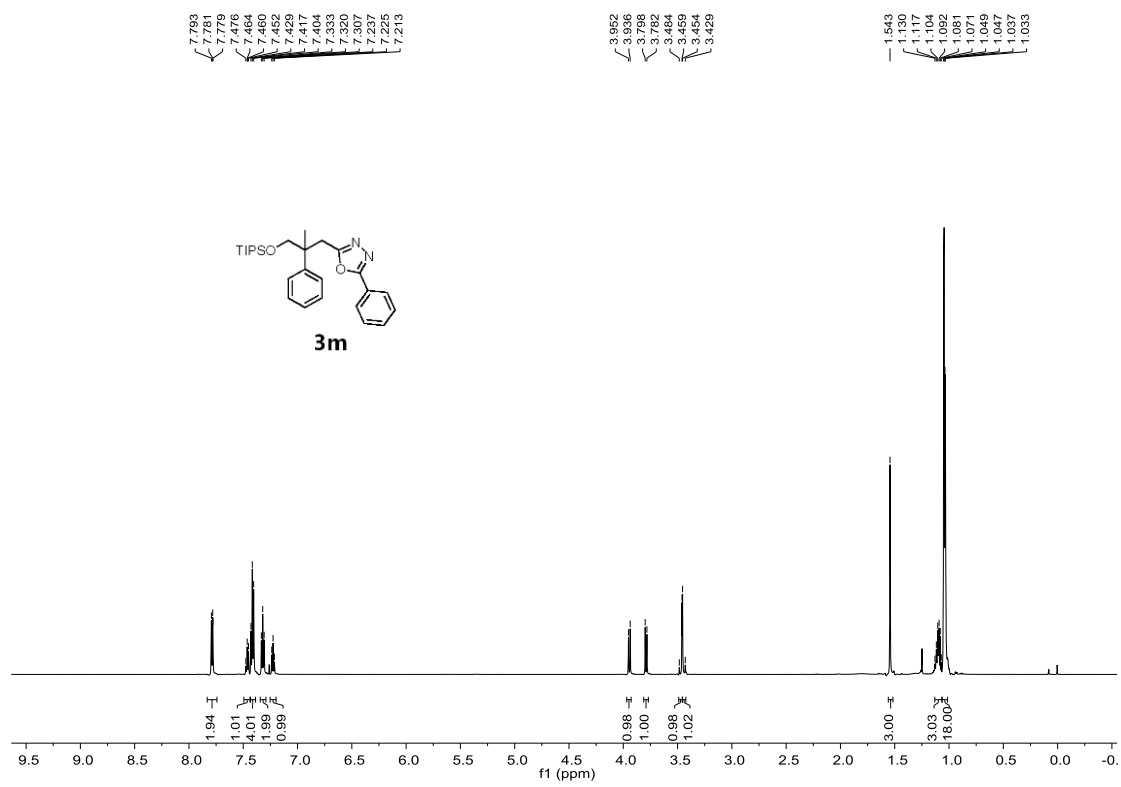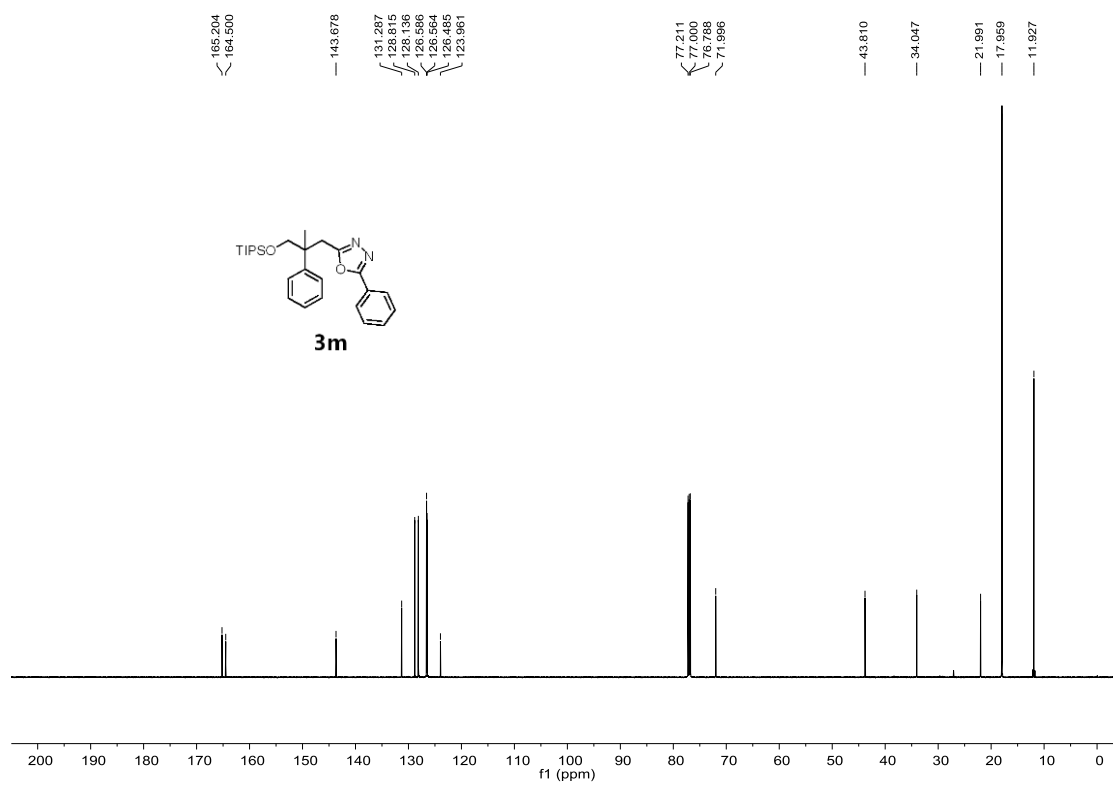

7.820  
7.808  
7.649  
7.635  
7.471  
7.459  
7.439  
7.425  
7.409  
7.334  
7.322  
7.305  
7.287  
7.240  
7.228  
7.216

3.664  
3.638  
3.499  
3.475  
3.388  
3.363  
3.195  
3.172

— 2.412  
— 2.271

— 1.656

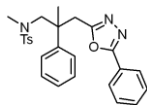

**3n**

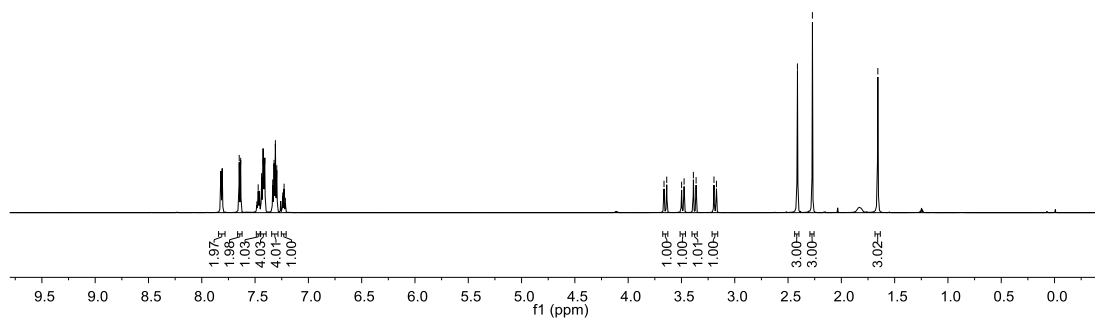

164.565  
164.448

143.514  
134.124  
134.168  
131.401  
129.699  
128.693  
128.603  
127.802  
127.483  
126.992  
126.609  
126.508  
123.805

77.212  
77.001  
76.789

— 62.129

42.495  
38.062  
35.662

22.826  
21.438

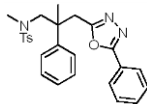

**3n**

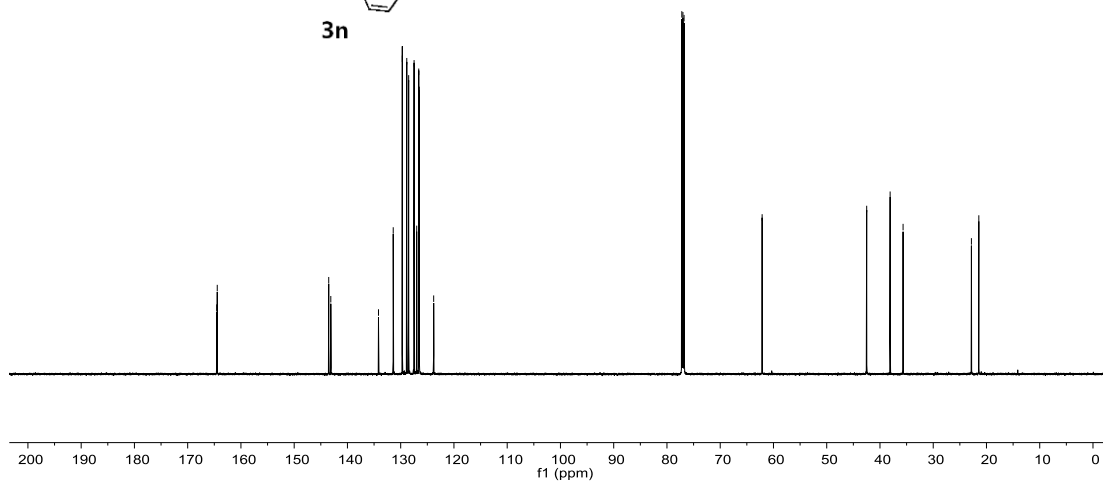

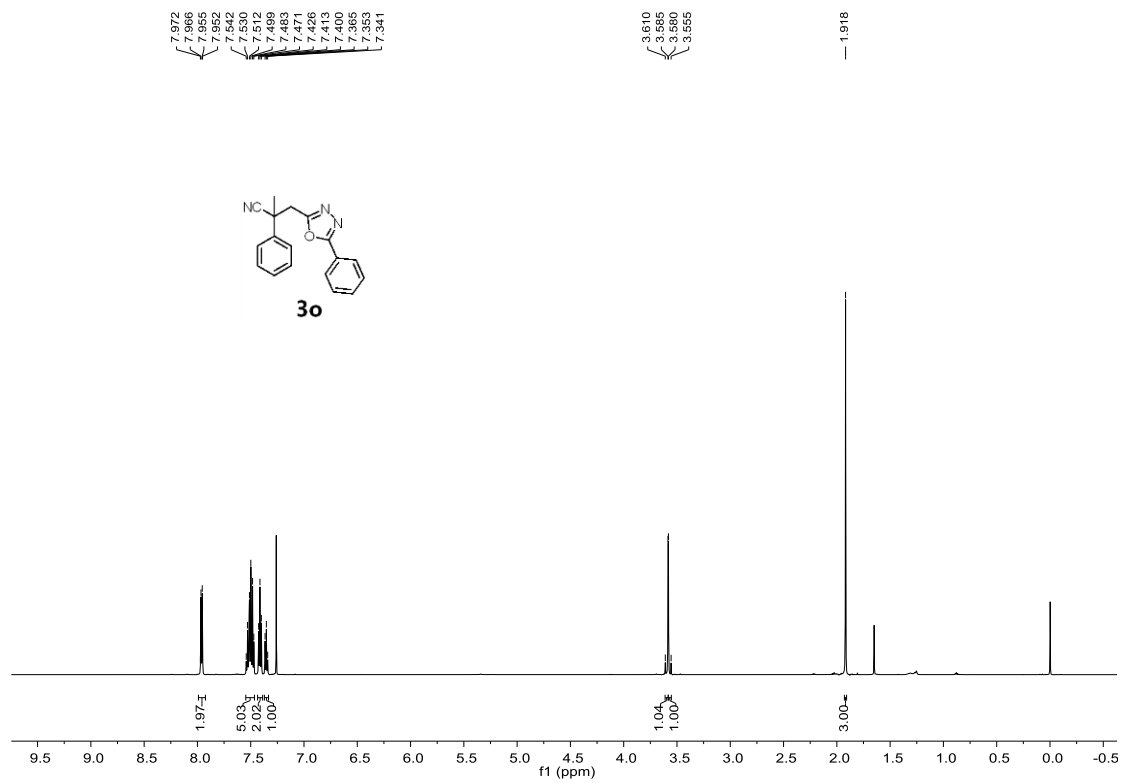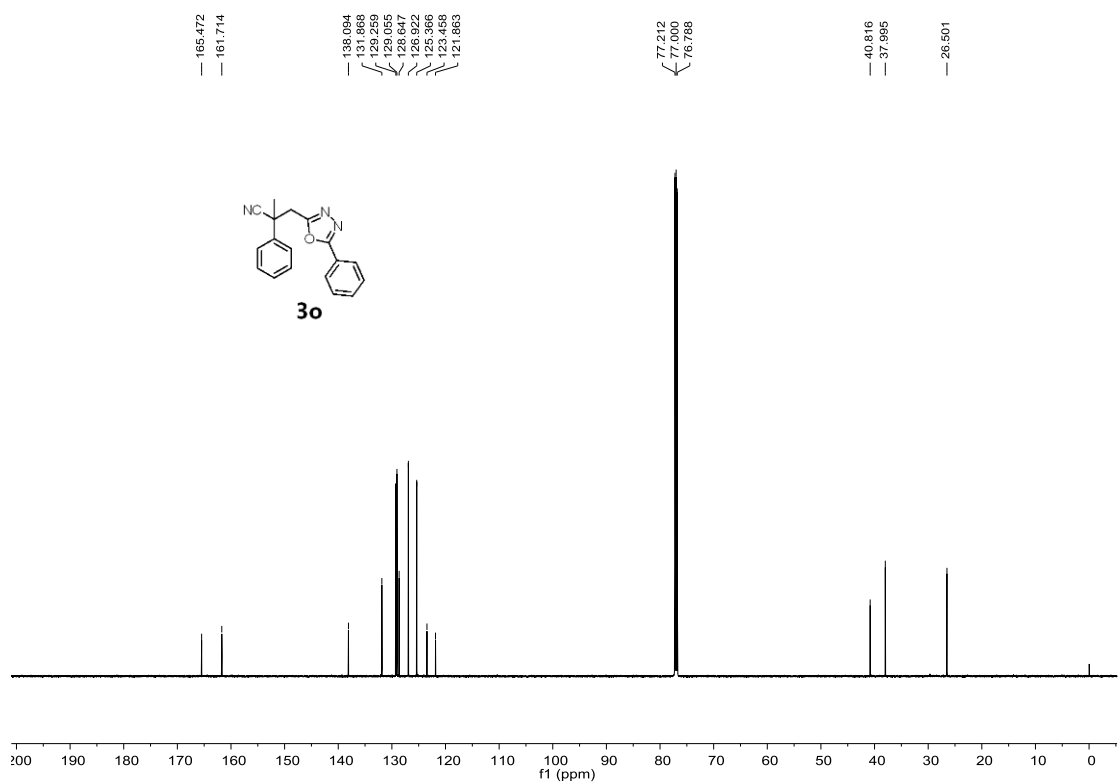

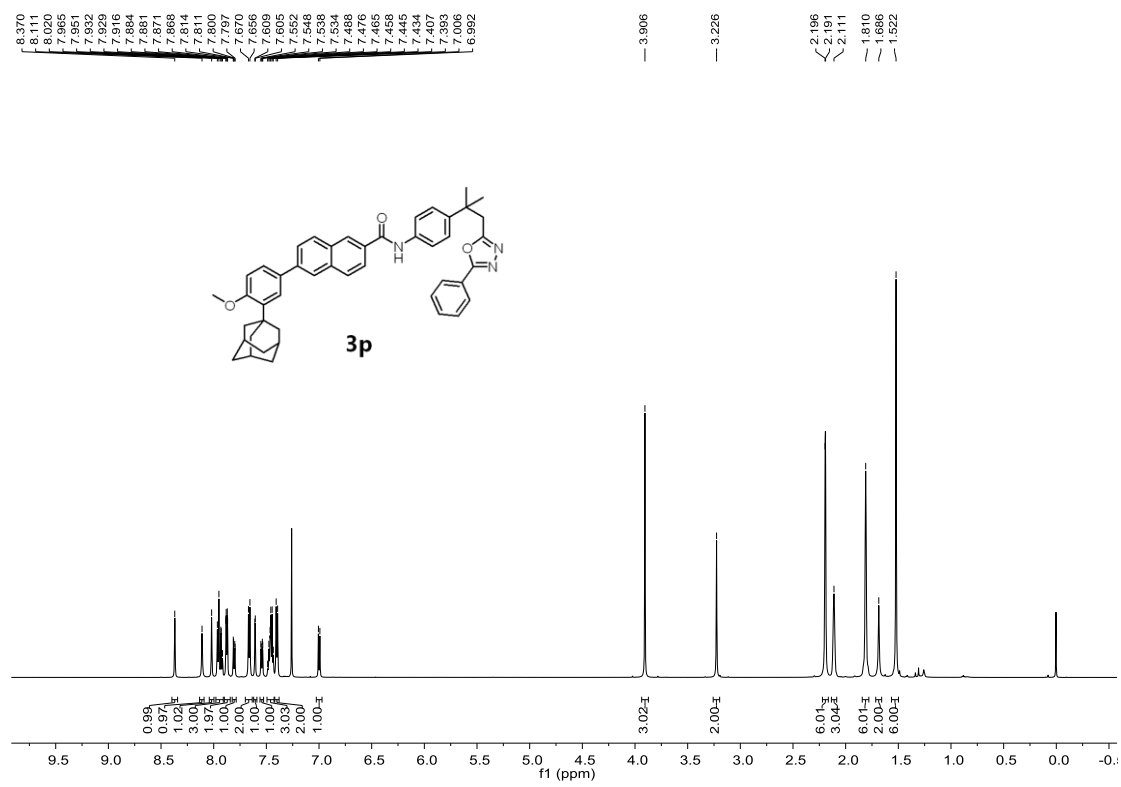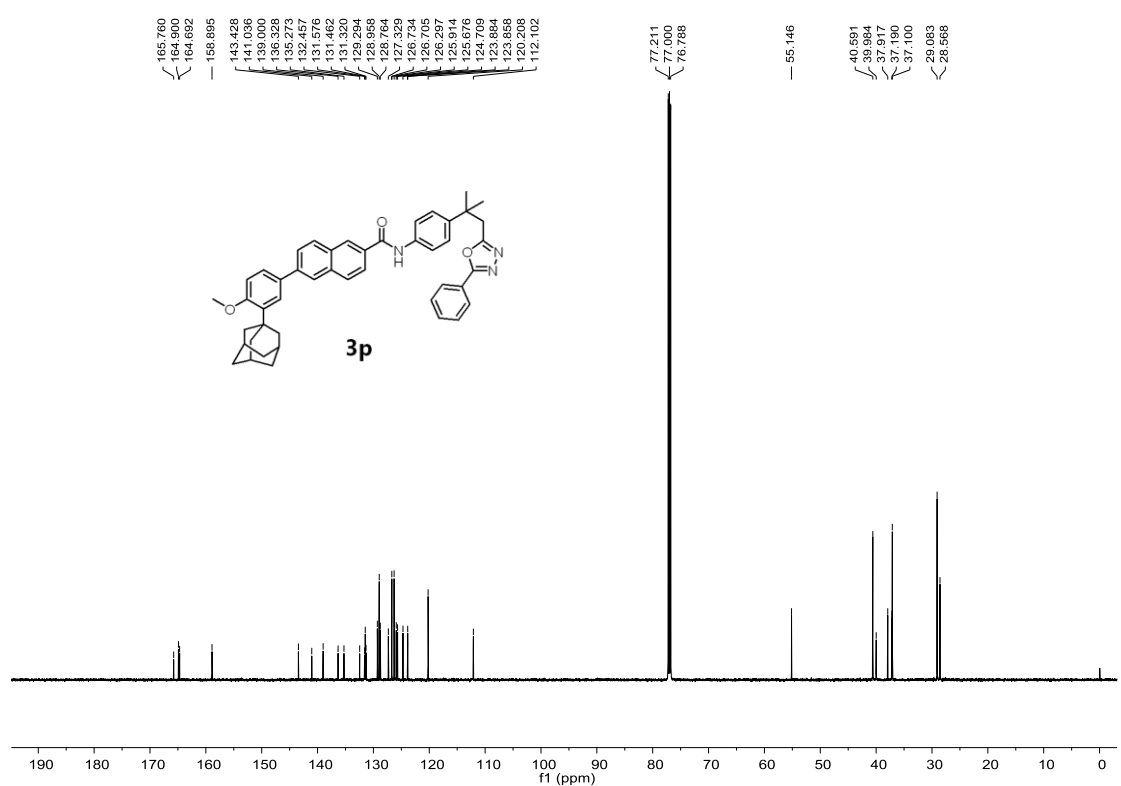

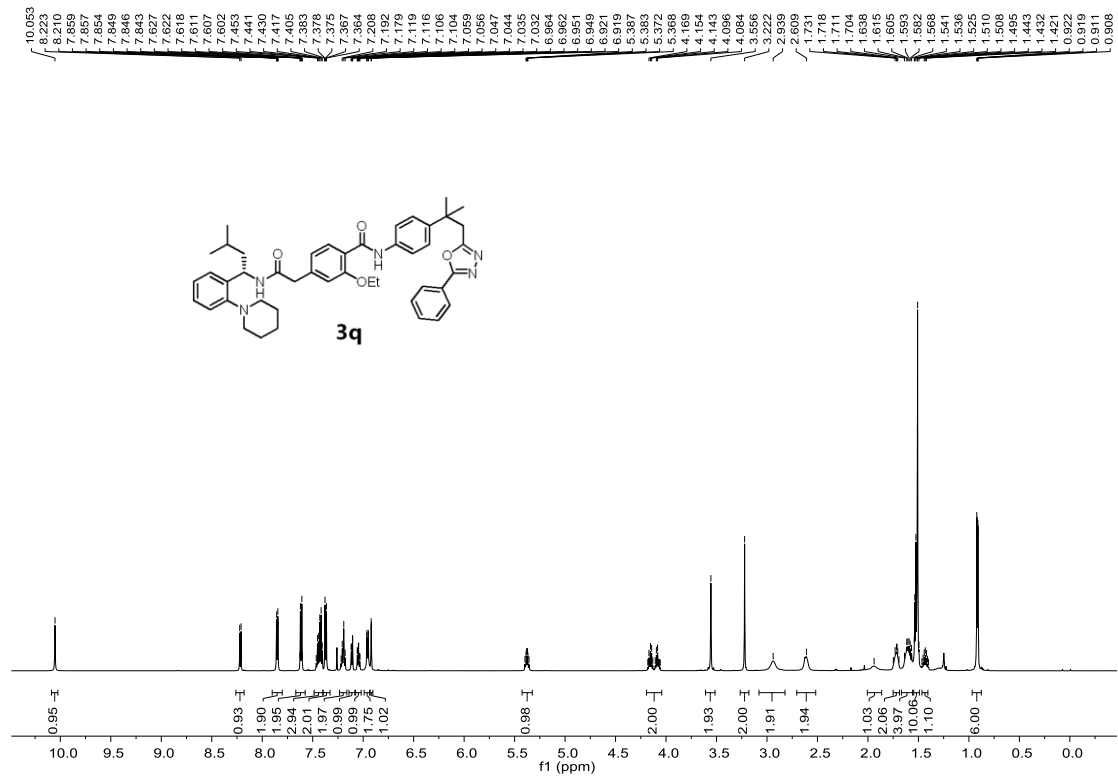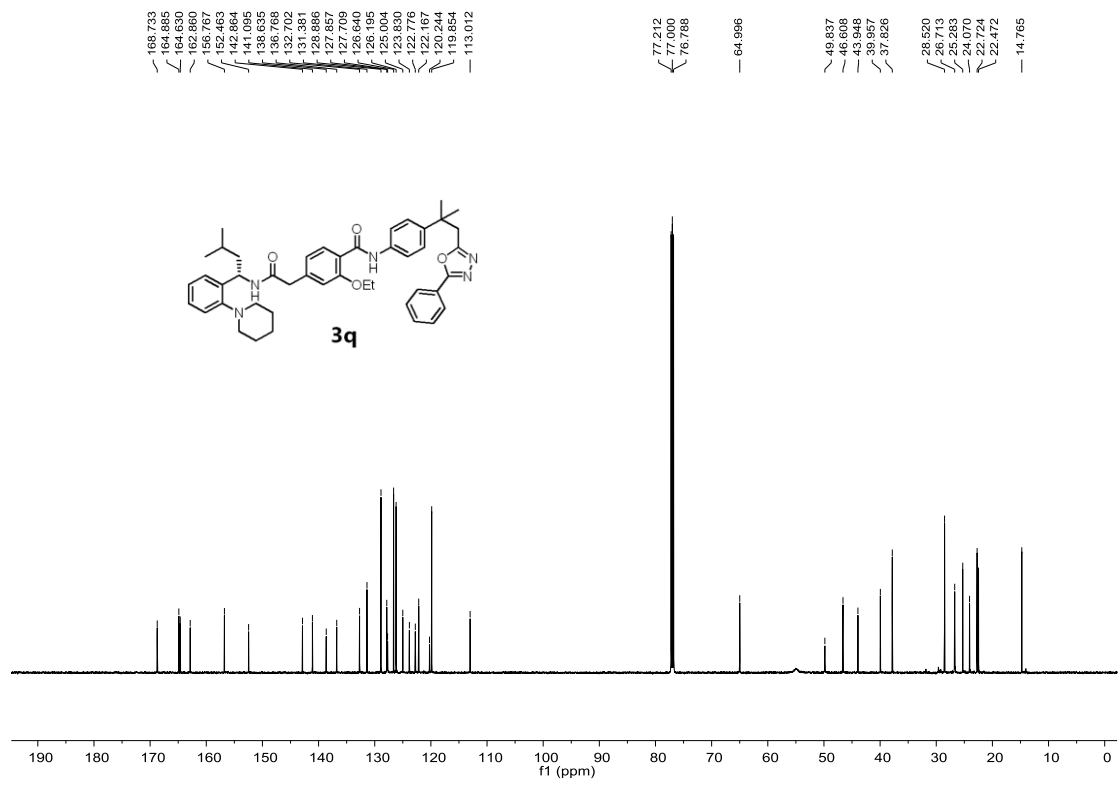



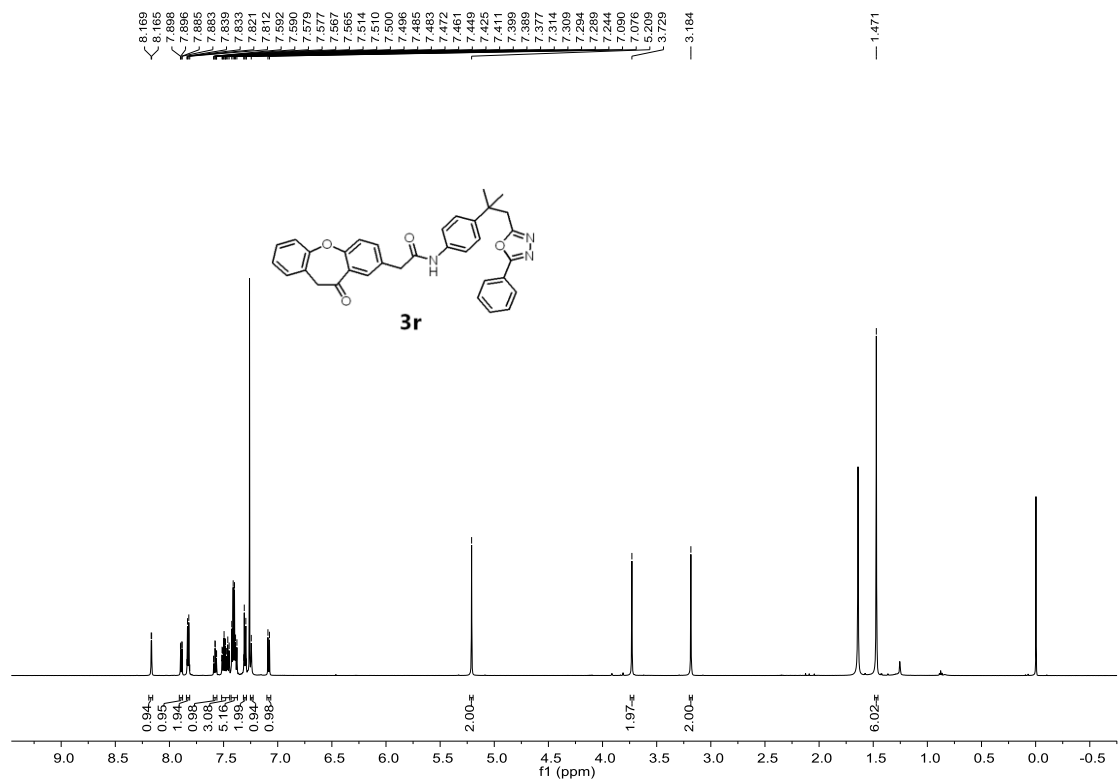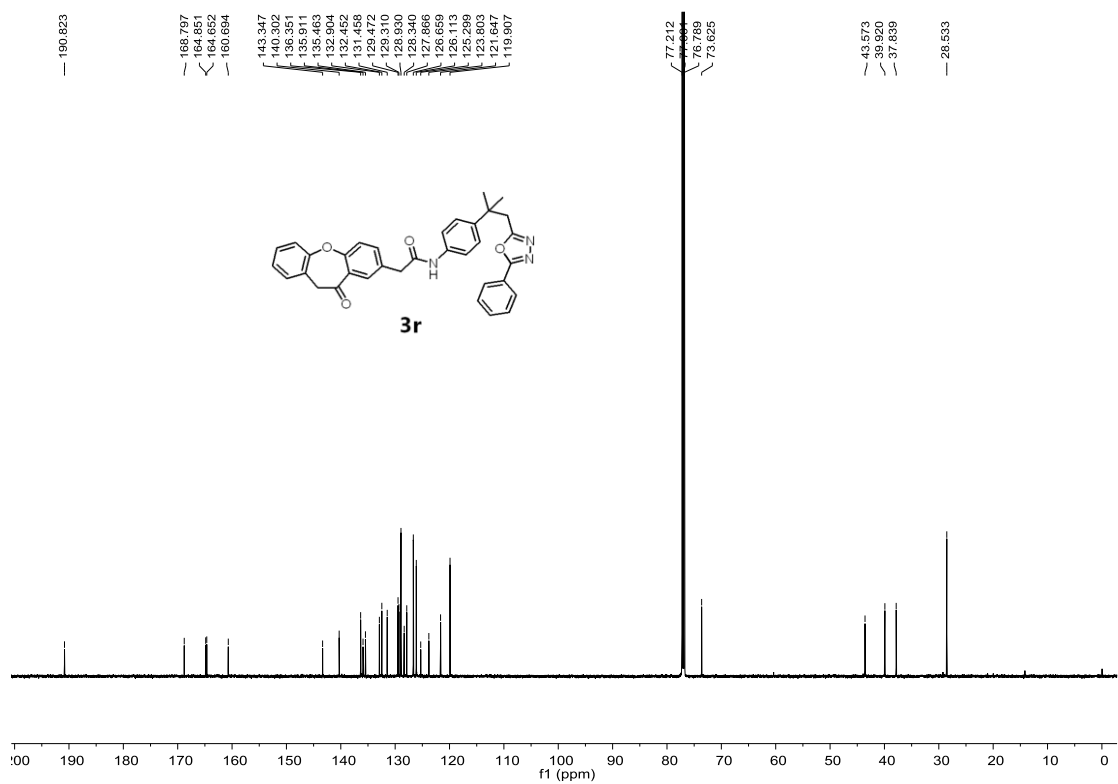

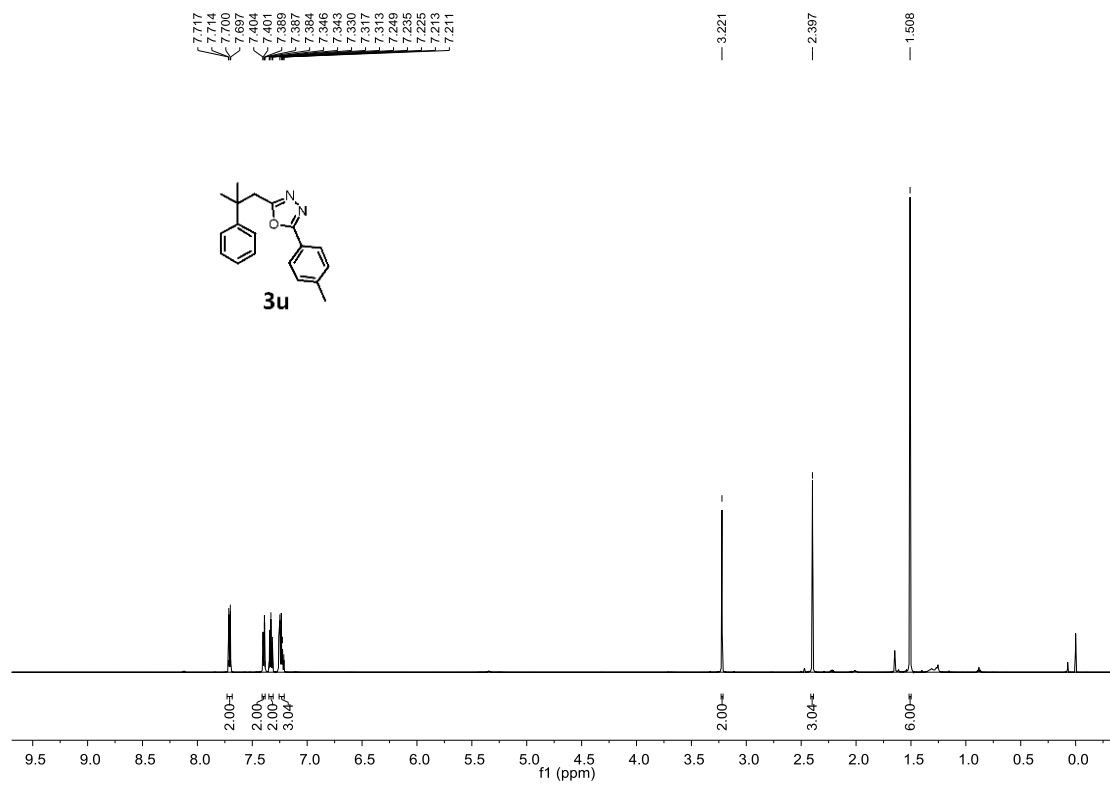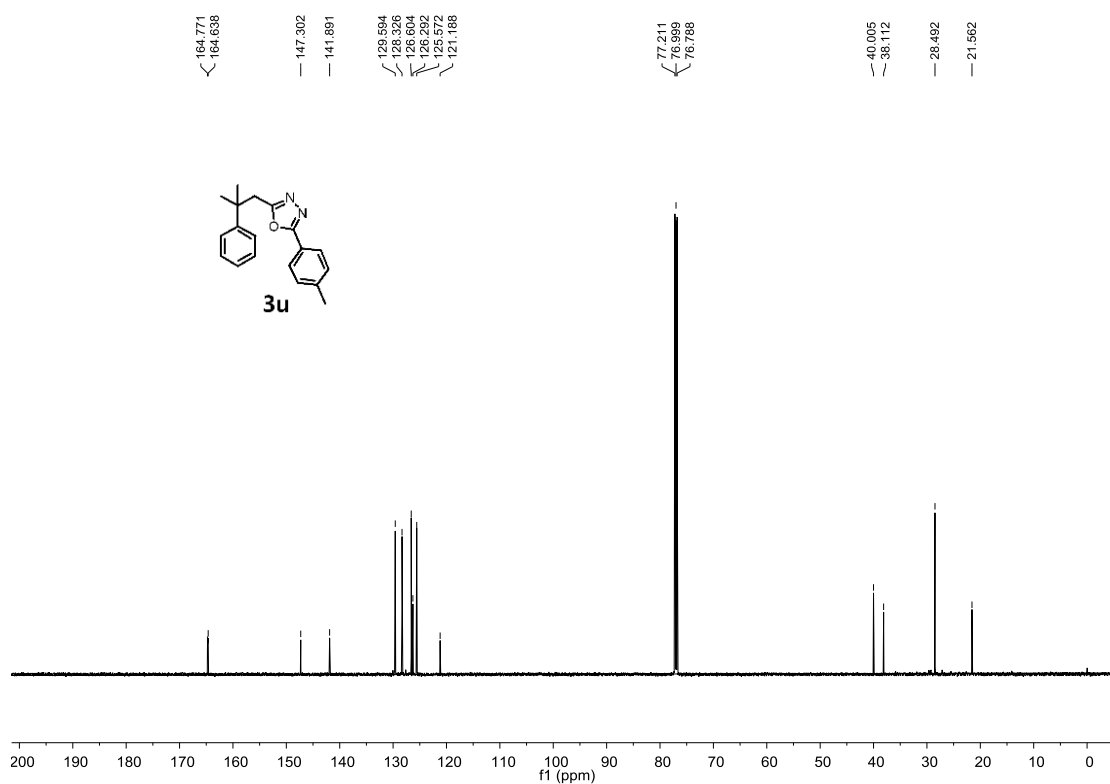

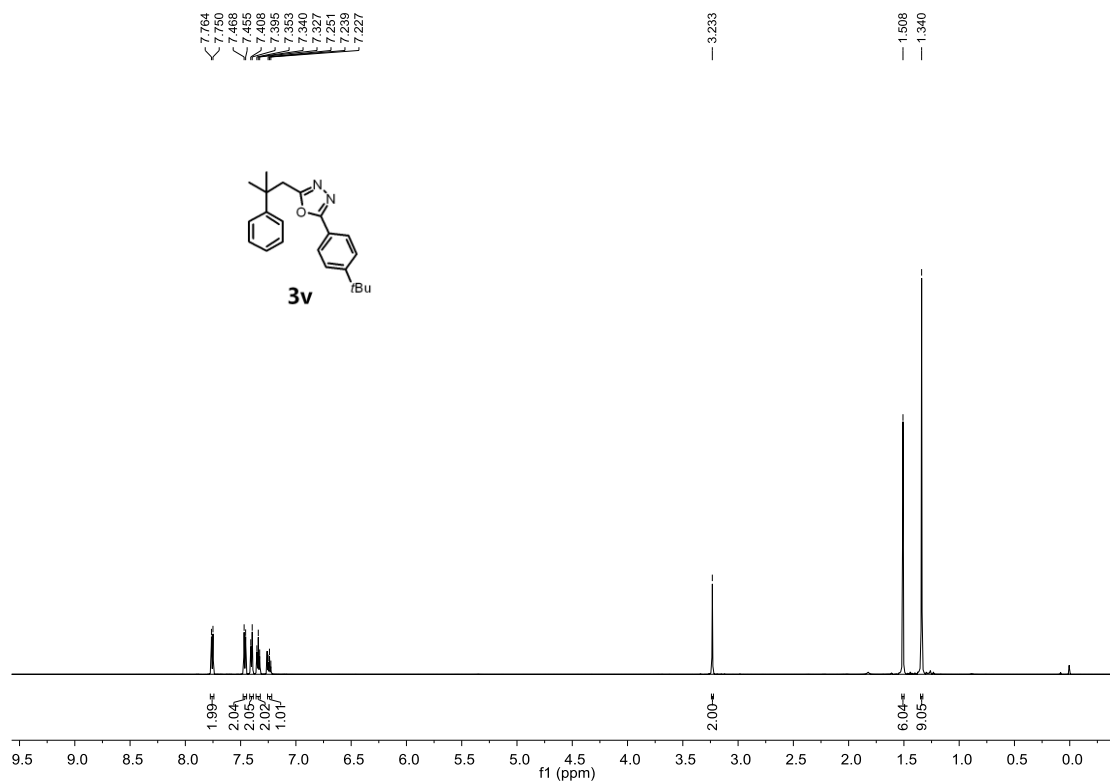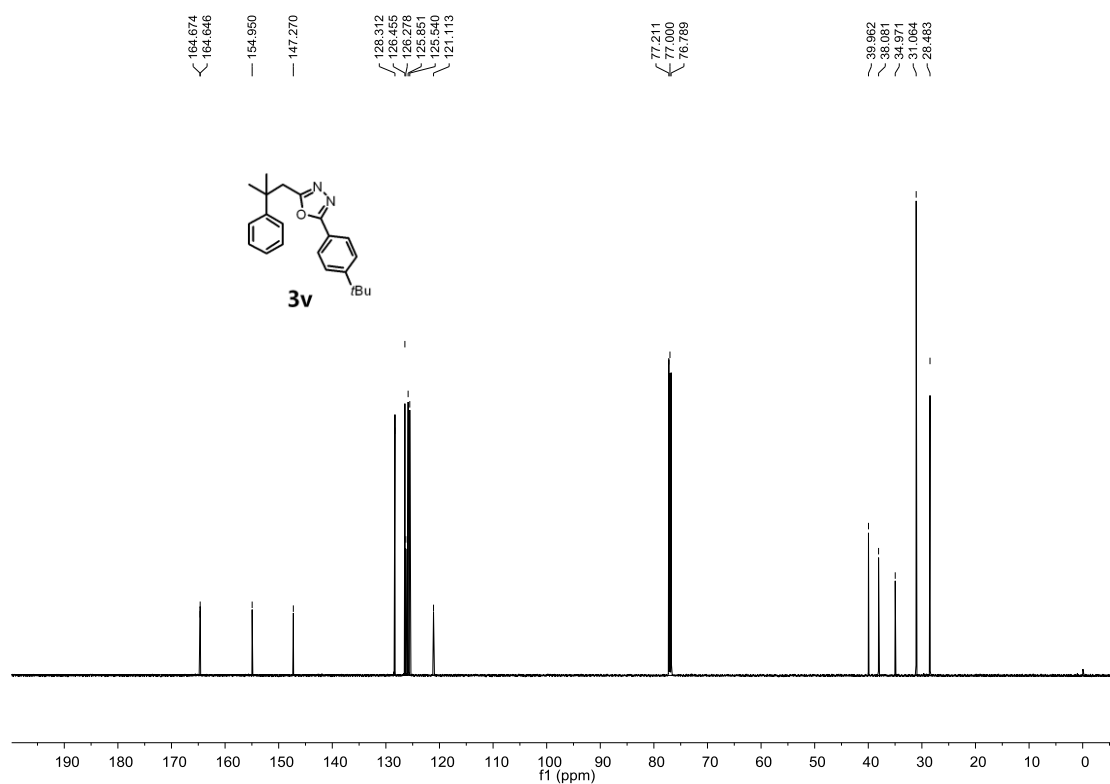

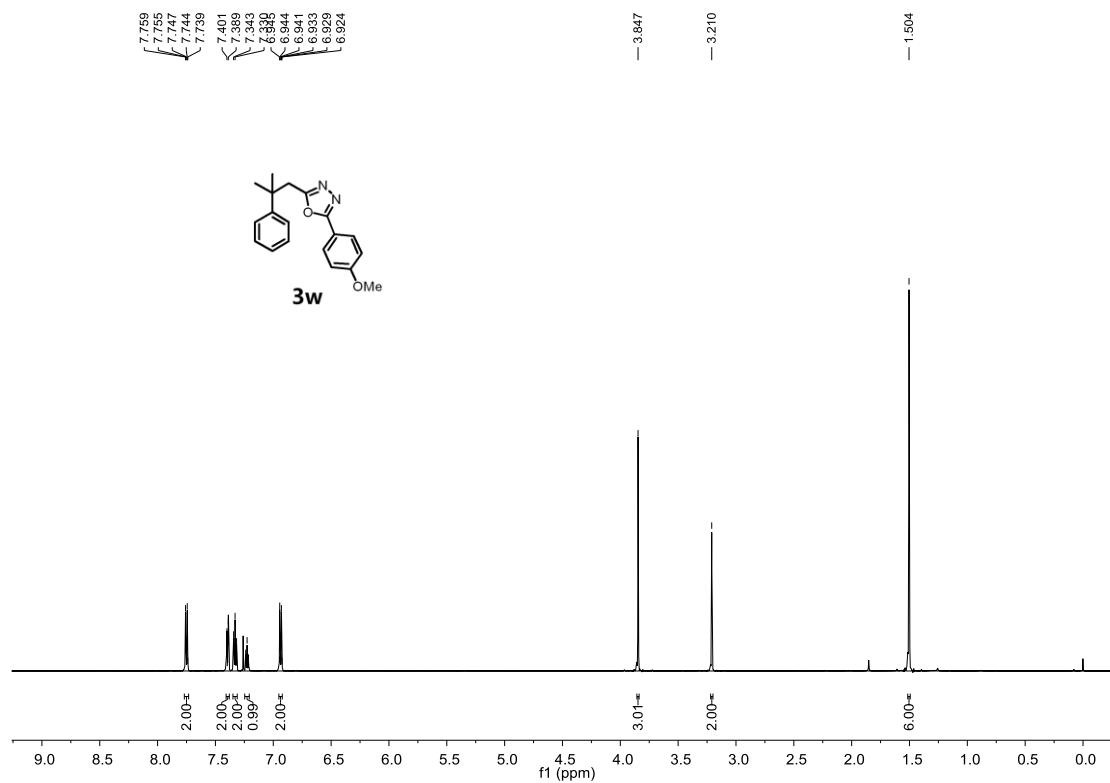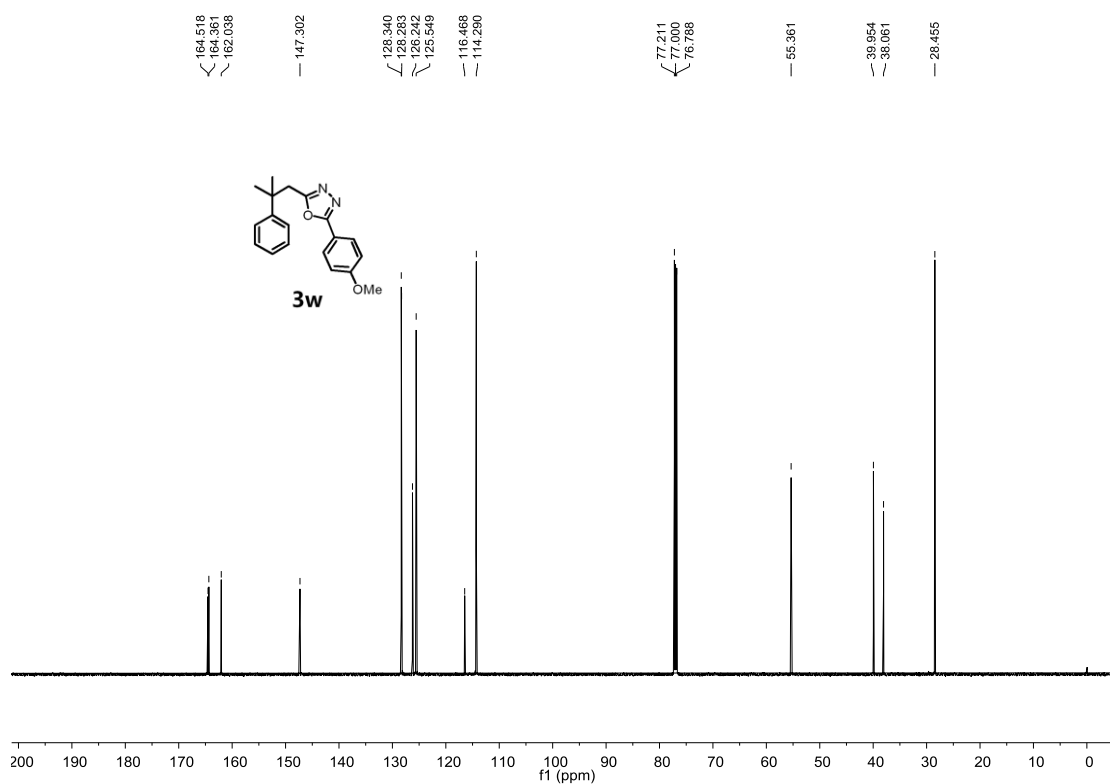

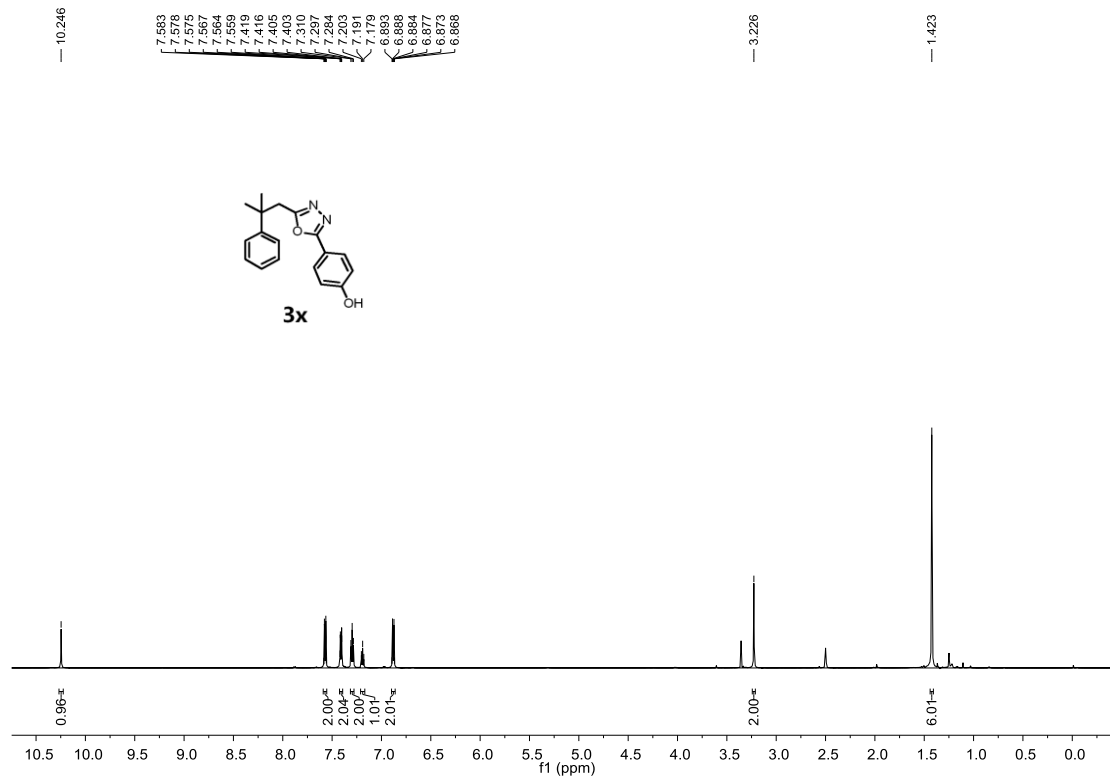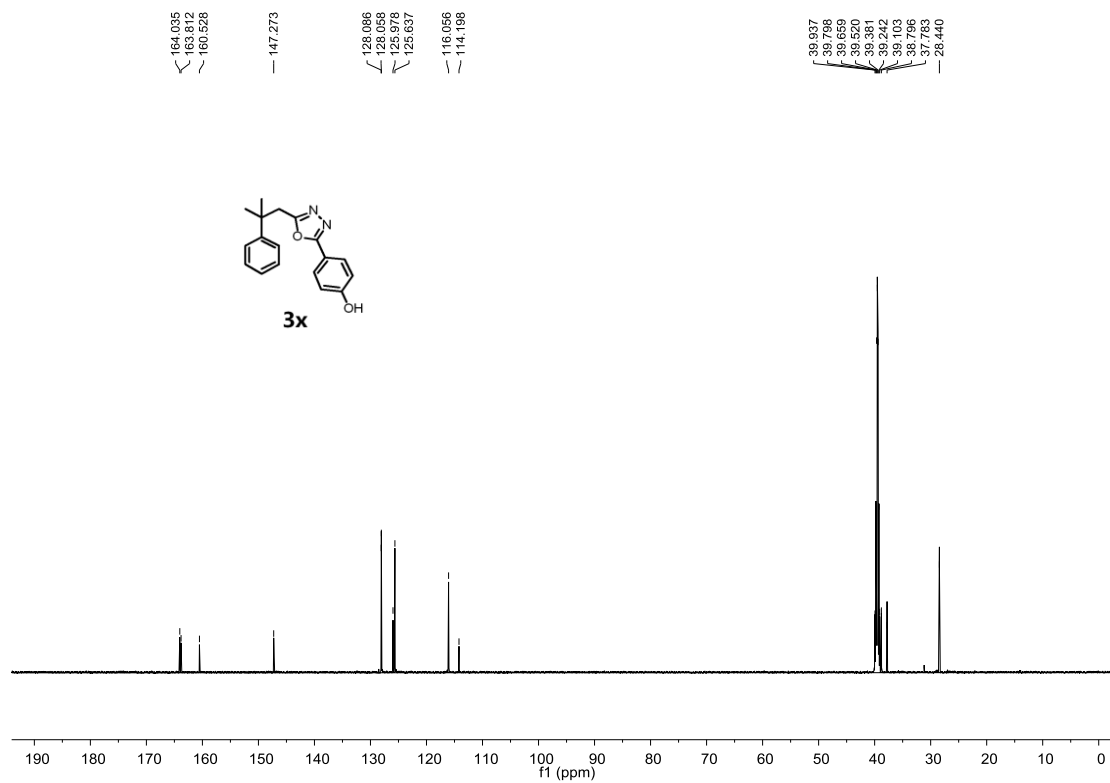

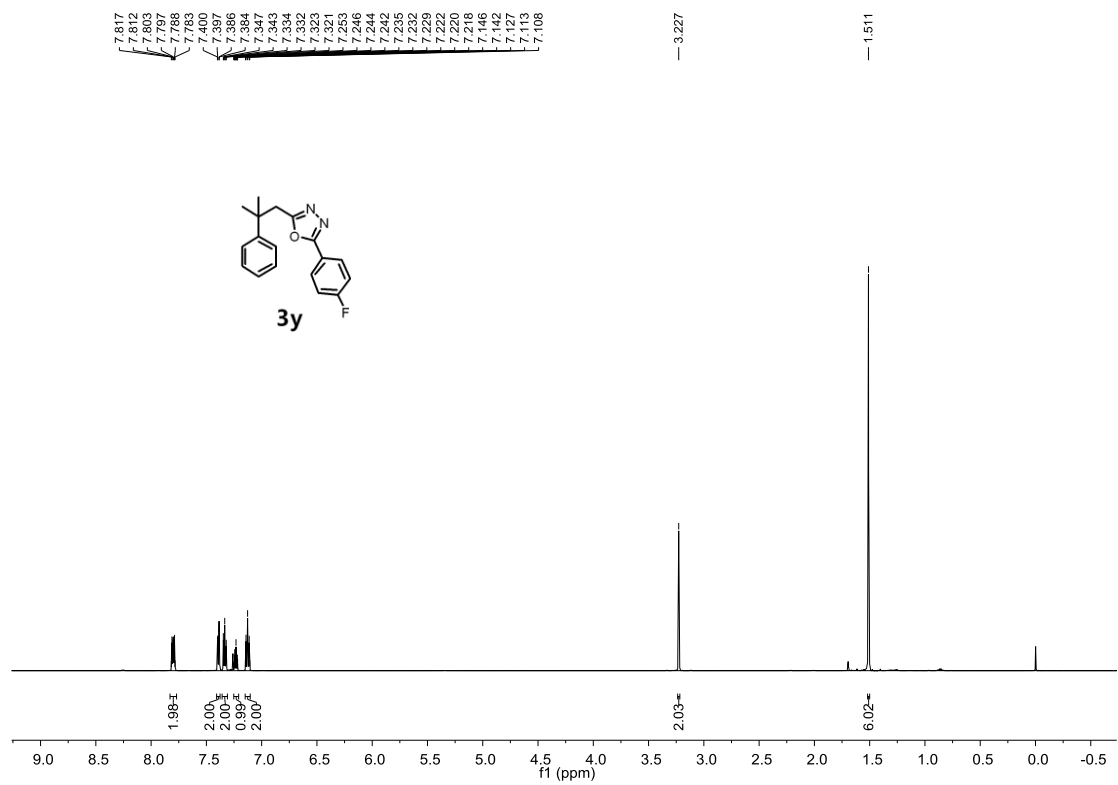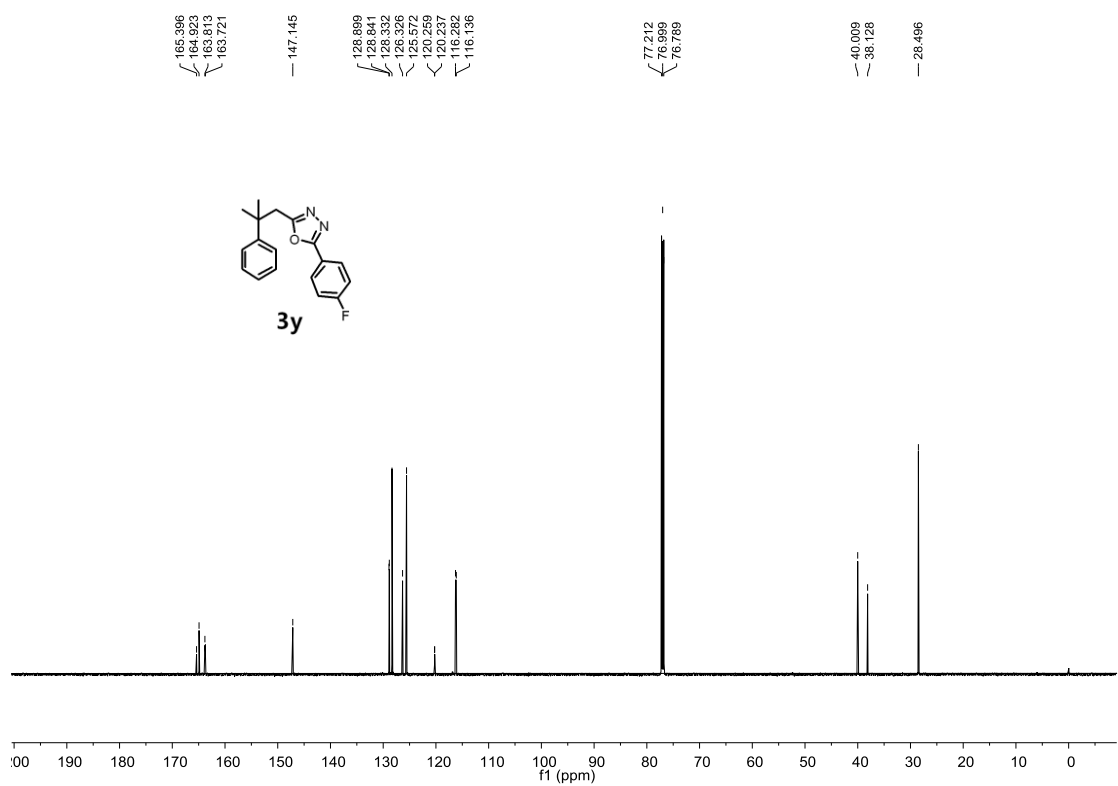

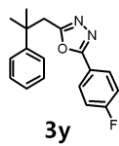

— -107.301

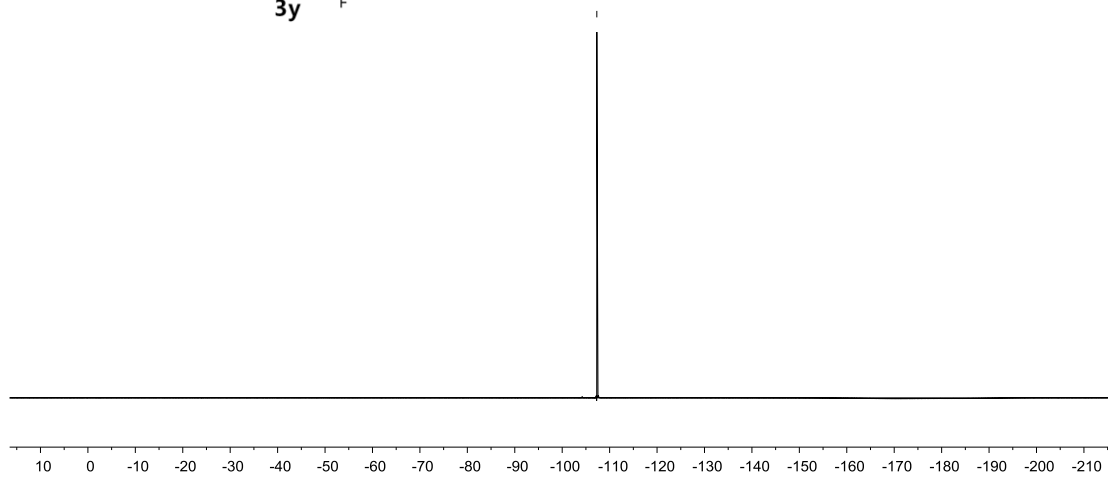

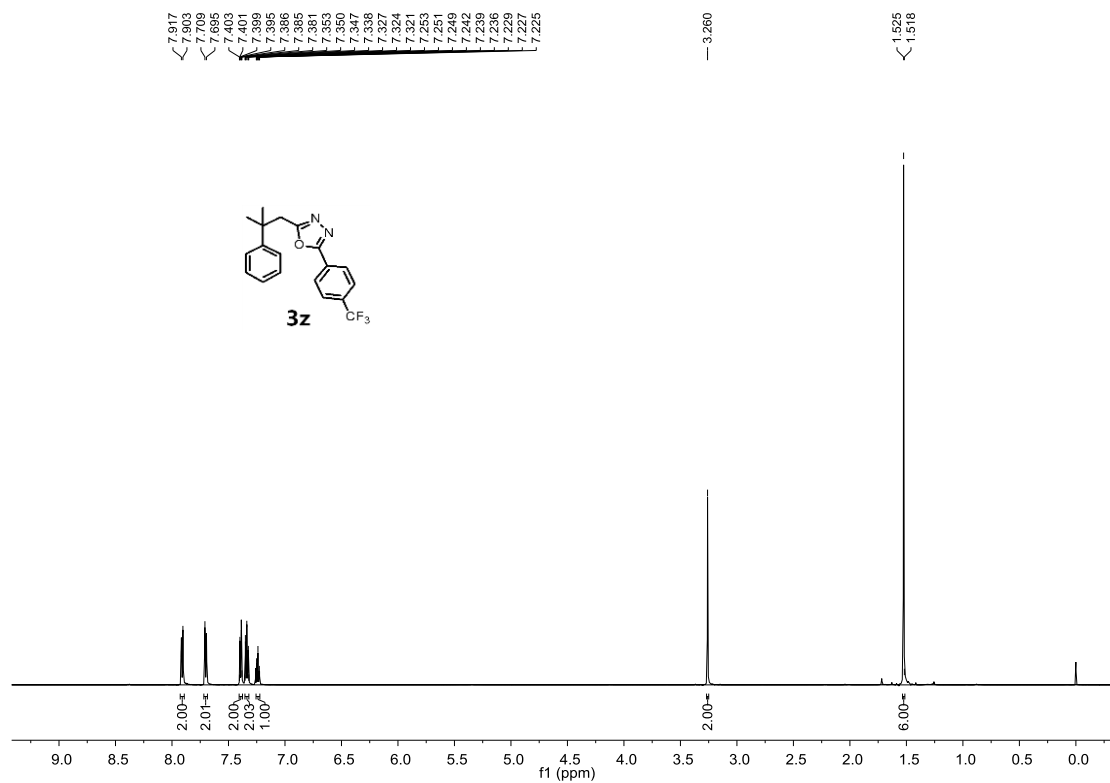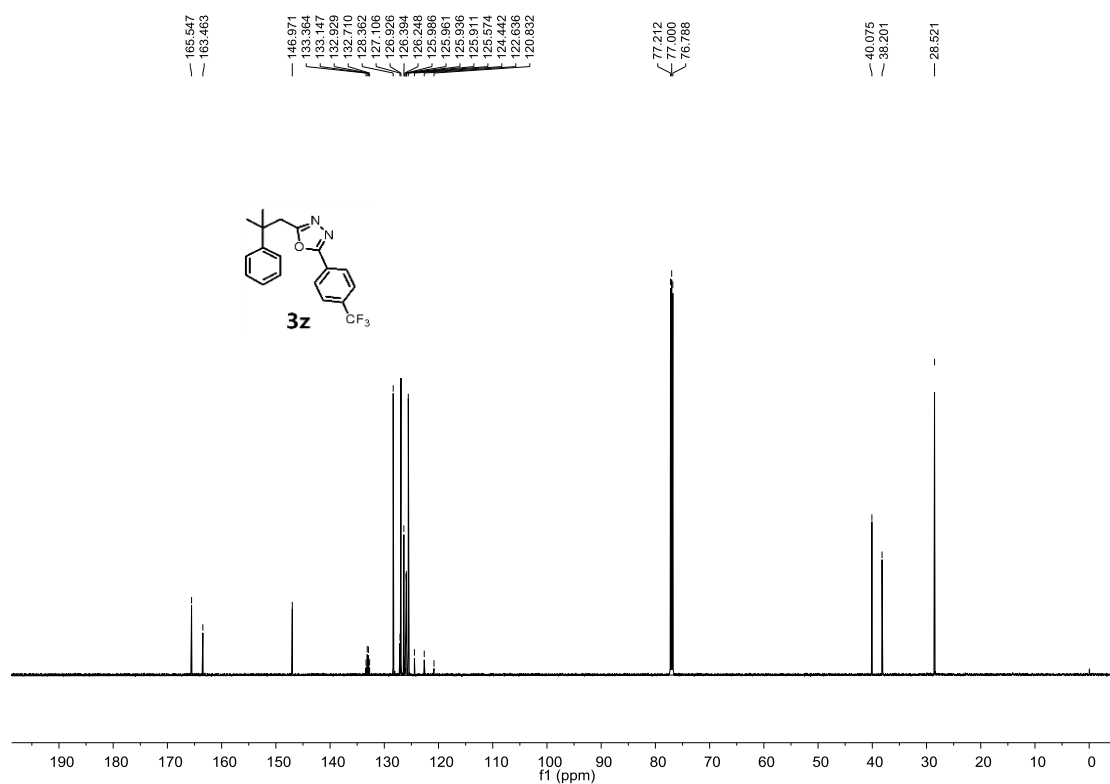



— 63.081

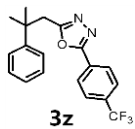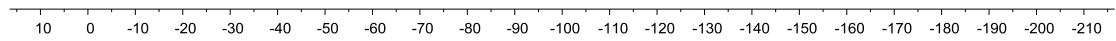

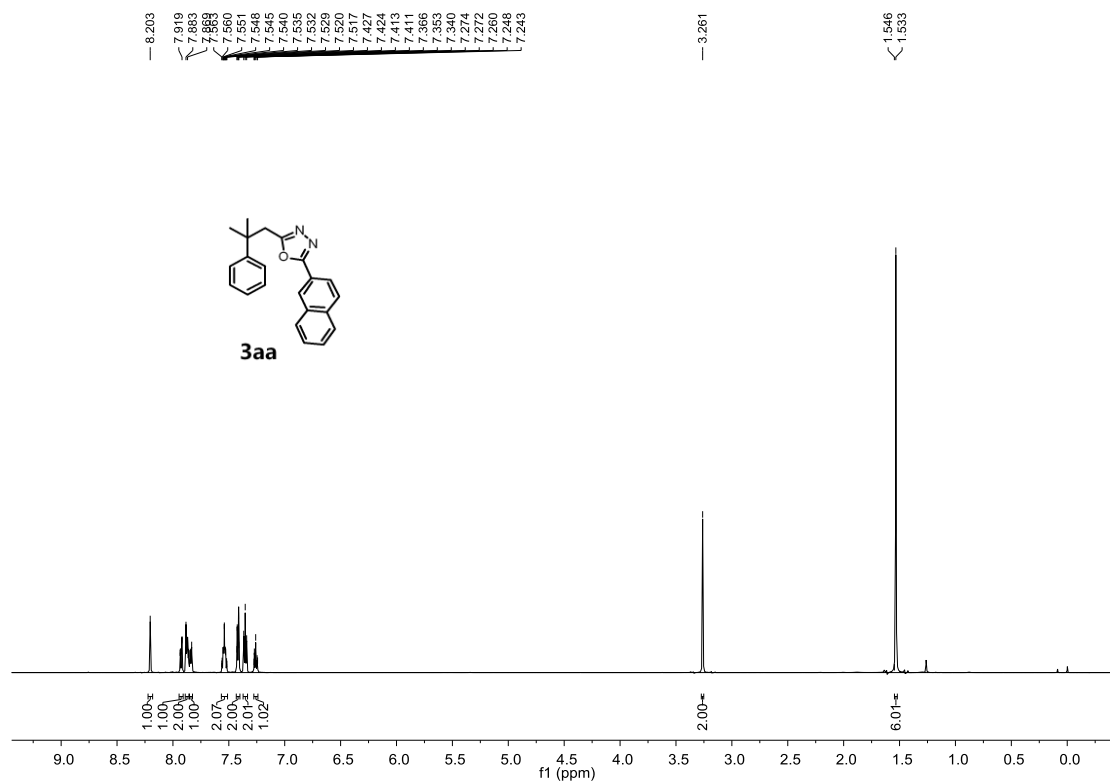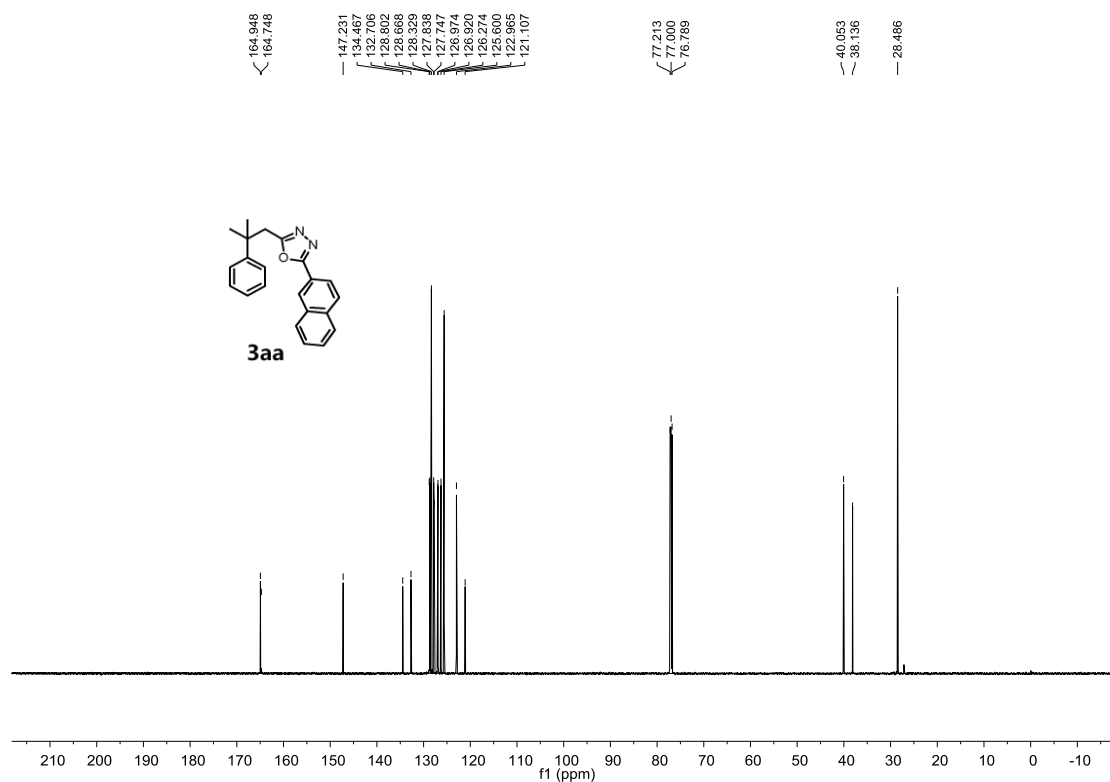

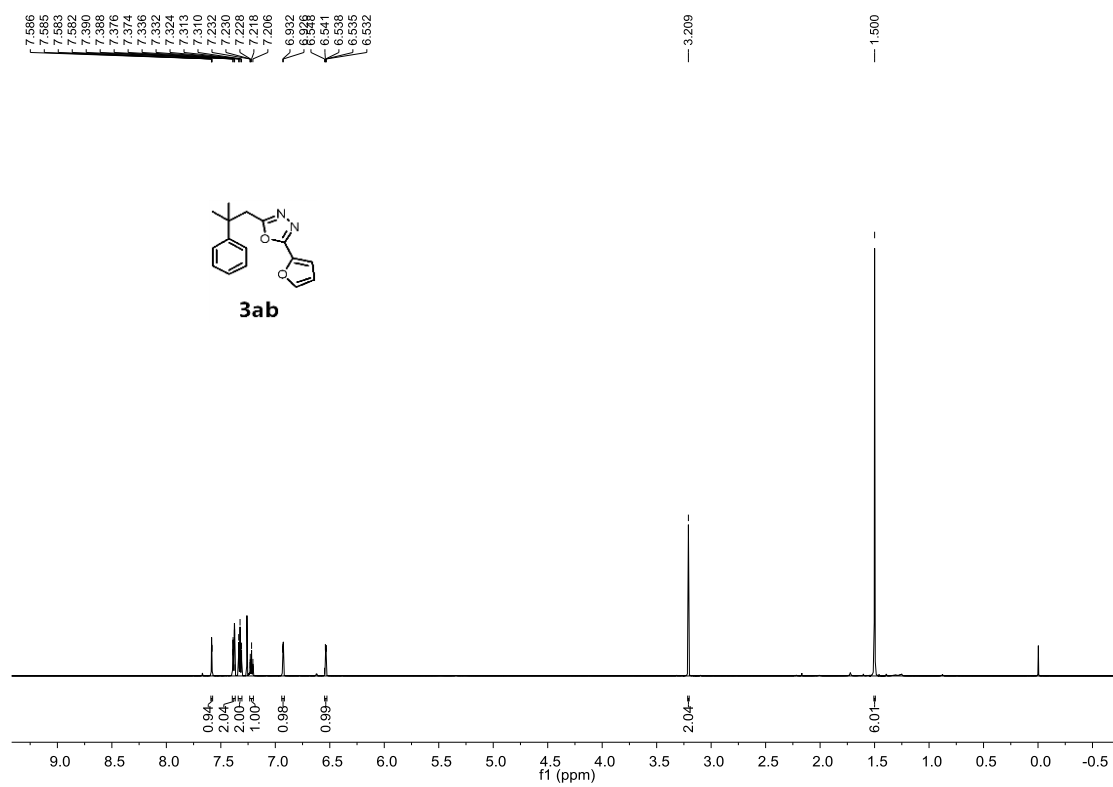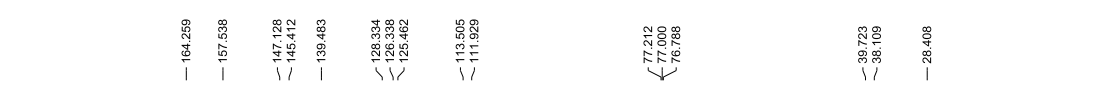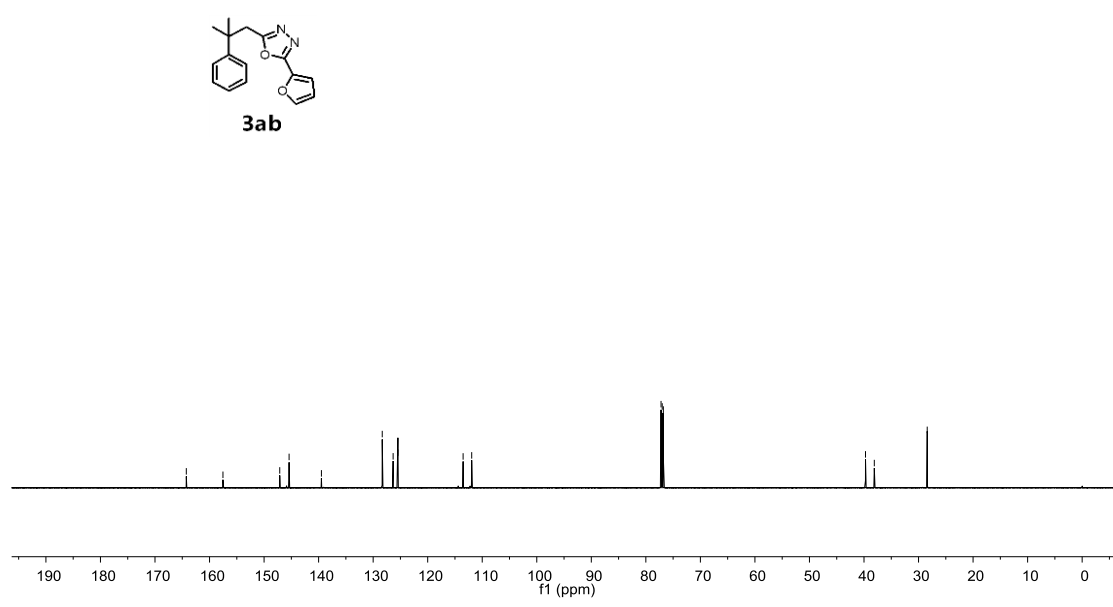

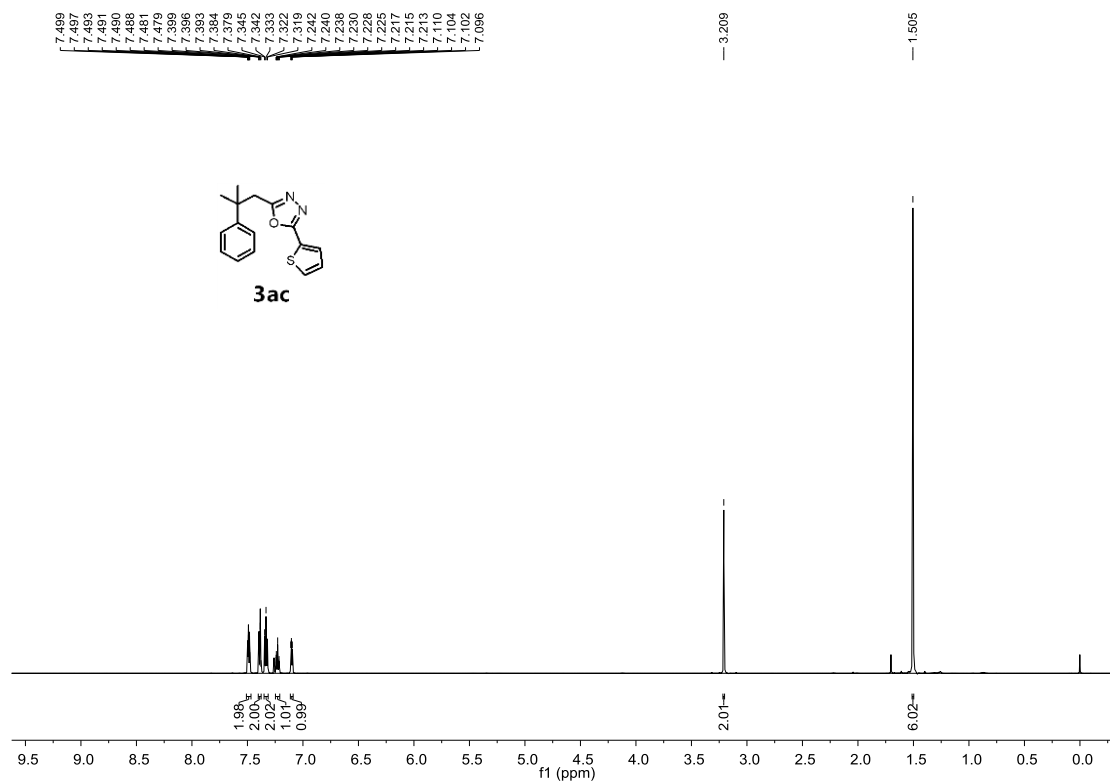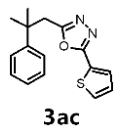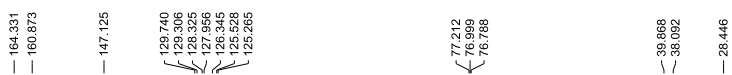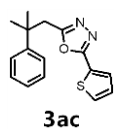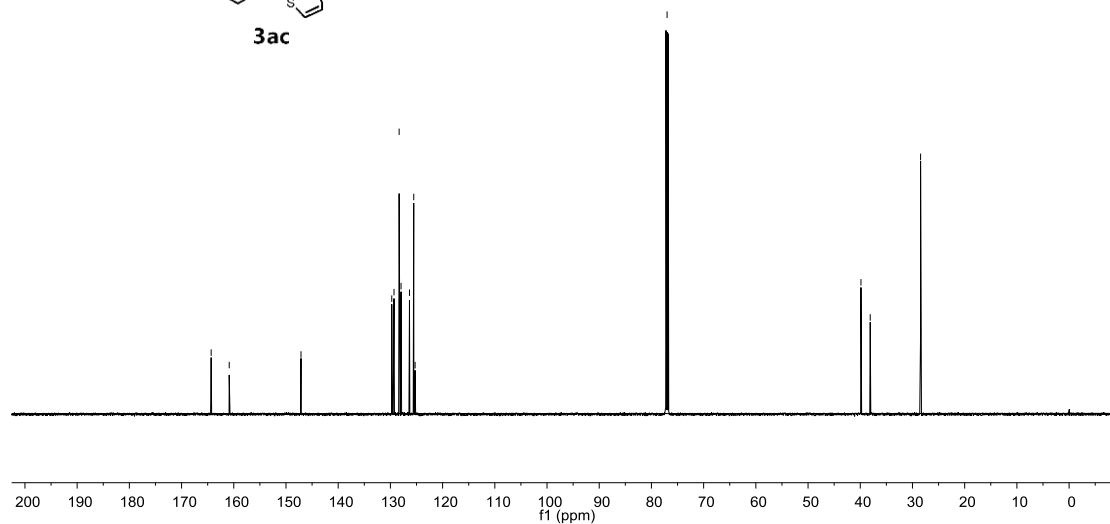

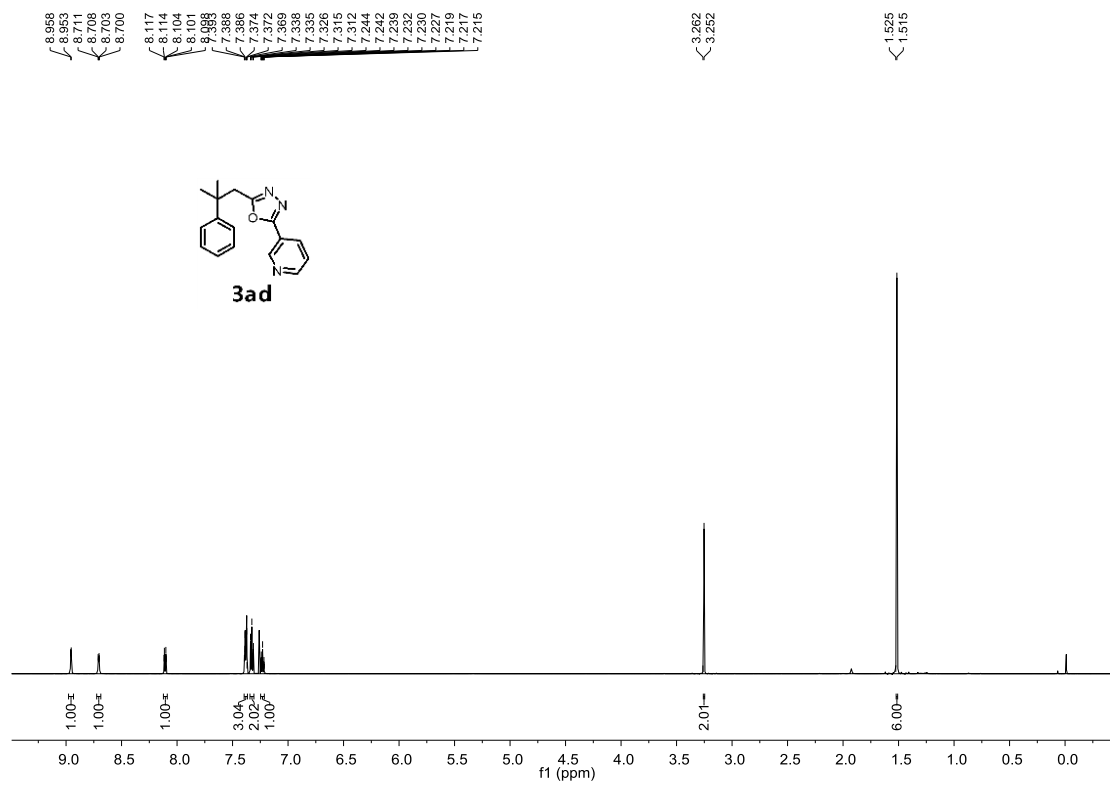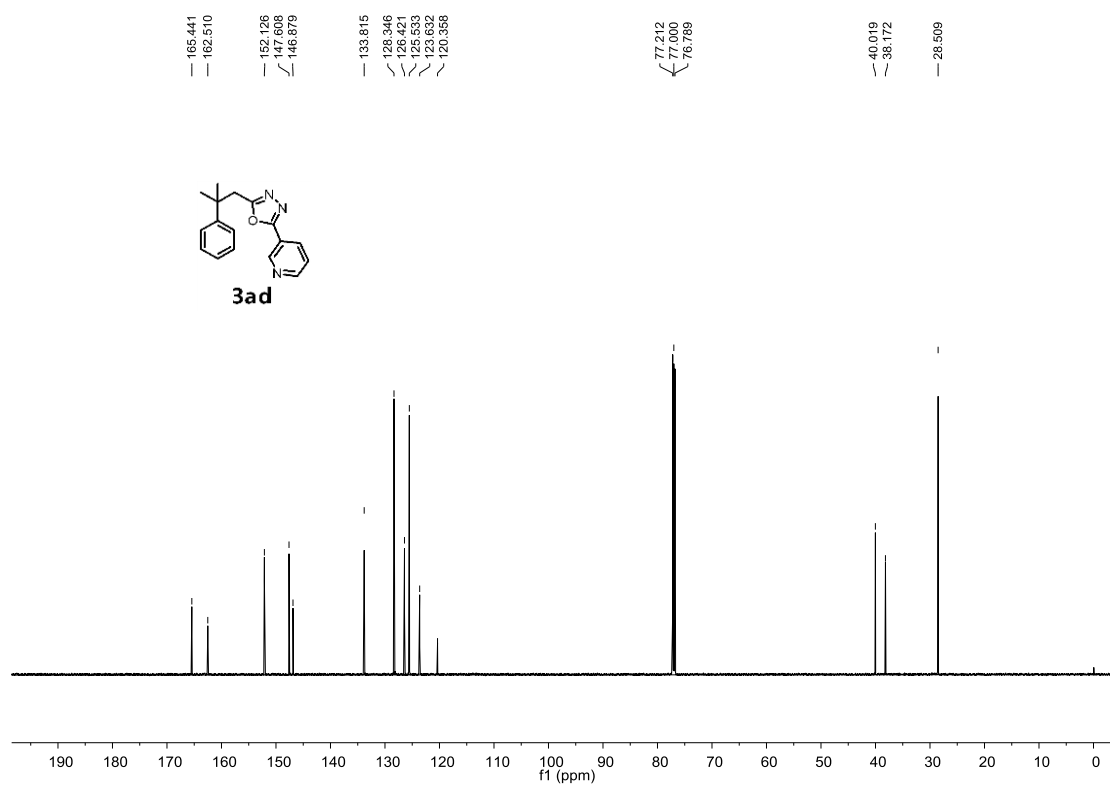

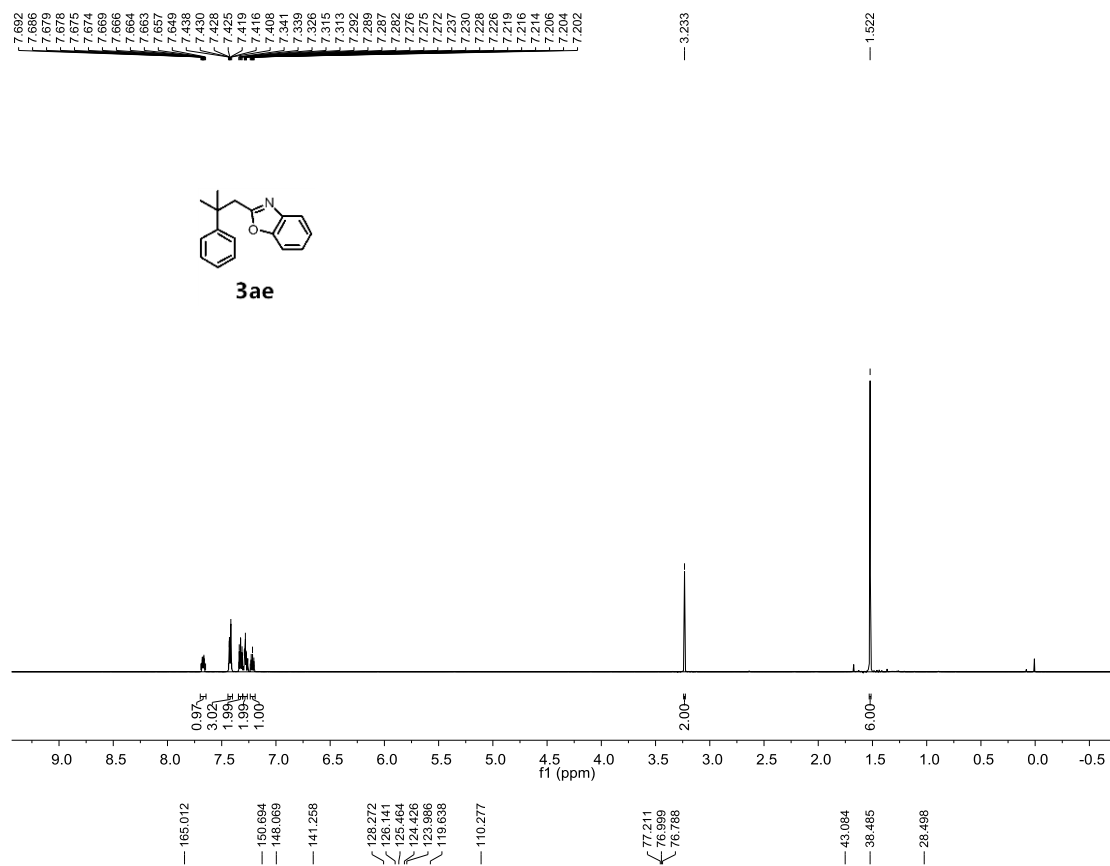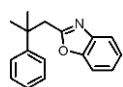

**3ae**

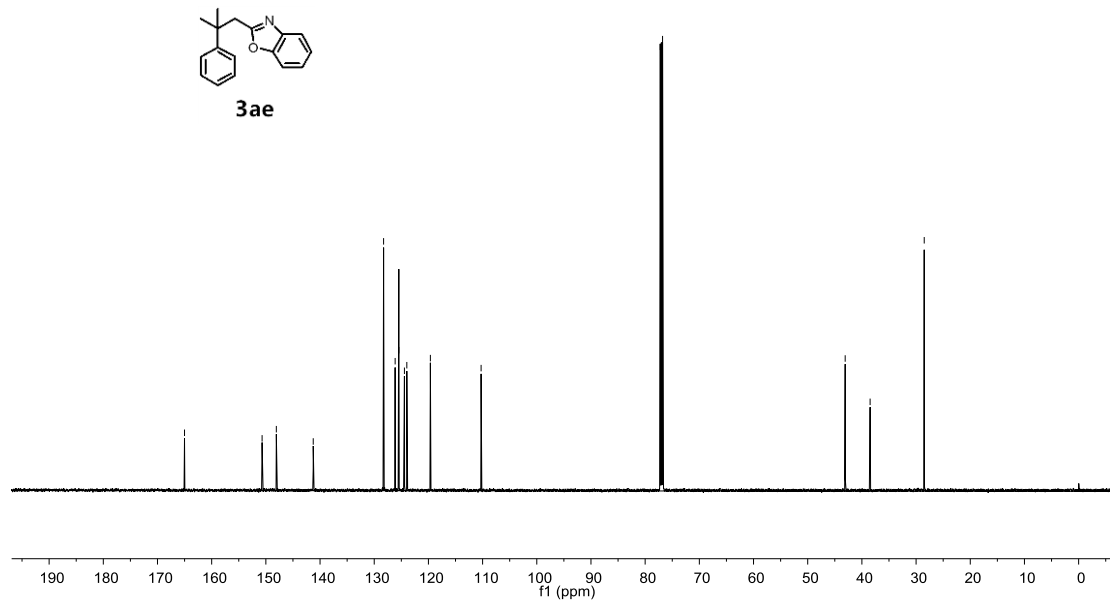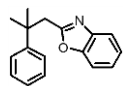

**3ae**



### 8.3 NMR Spectra for Kinetic Isotope Effect Studies

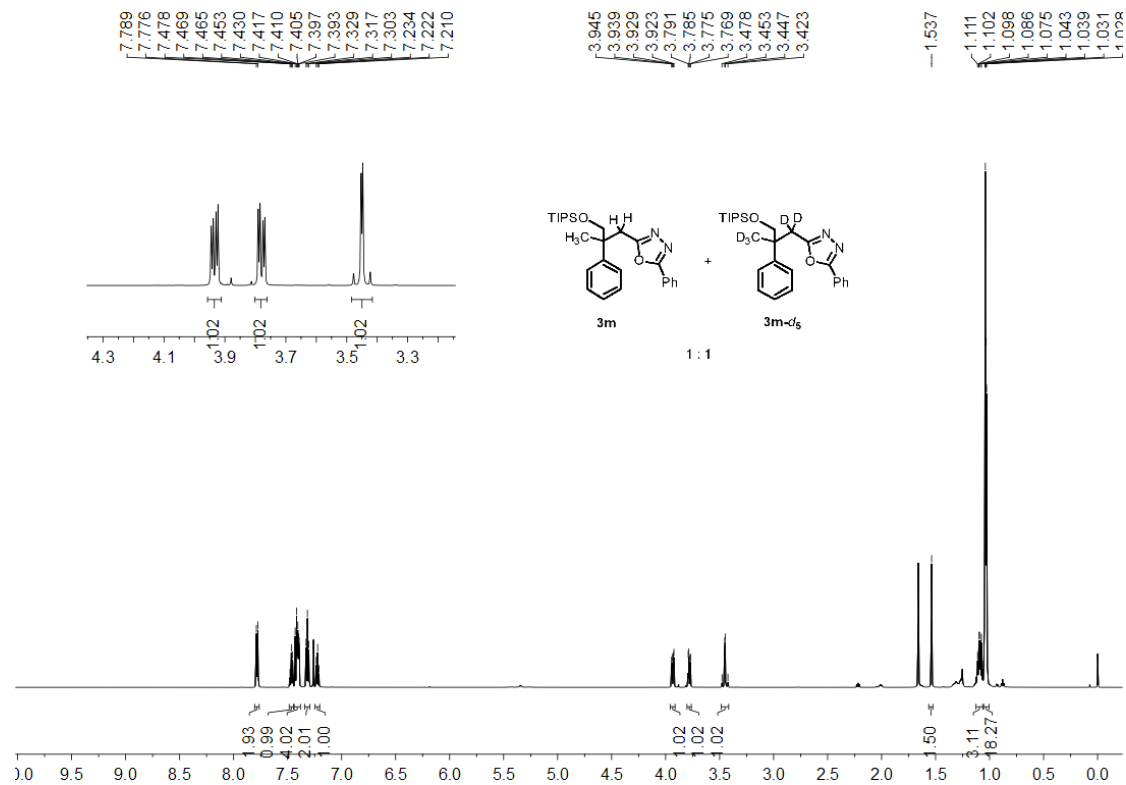

Supplement: d2cc01944b1.pdf [file d2cc01944b1.pdf]
